1 CaV1 and CaV2 calcium channels mediate the release of distinct pools of synaptic vesicles

2

3 Brian D. Mueller<sup>1#</sup>, Sean A. Merrill<sup>1#</sup>, Shigeki Watanabe<sup>2,3</sup>, Ping Liu<sup>4</sup>, Anish Singh<sup>1</sup>, Alex Cherry<sup>1</sup>,

4 Malan Silva<sup>1,6</sup>, Zhao-Wen Wang<sup>4</sup>, Erik M. Jorgensen<sup>1,5\*</sup>

5

6 <sup>1</sup> Department of Biology, University of Utah, Salt Lake City, UT

7 <sup>2</sup> Department of Cell Biology, John Hopkins University, Baltimore, MD

8 <sup>3</sup> Solomon H. Snyder Department of Neuroscience, John Hopkins University, Baltimore, MD

9 <sup>4</sup> Department of Neuroscience, University of Connecticut Medical School, Farmington, CT

10 <sup>5</sup> Howard Hughes Medical Institute, University of Utah, Salt Lake City, UT

11 <sup>6</sup> Human Technopole Foundation, Milan, Italy

12 \* Lead contact

13 # Authors contributed equally towards this work

14

## 15 **Abstract**

16           Activation of voltage-gated calcium channels at synapses leads to local increases in  
17 calcium and the fusion of synaptic vesicles. However, presynaptic output will be determined by  
18 the density of calcium channels, the dynamic properties of the channel, the distance to docked  
19 vesicles, and the release probability at the docking site. We demonstrate that at *C. elegans*  
20 neuromuscular junctions, CaV2, and CaV1 mediate the release of two distinct pools of synaptic  
21 vesicles. Superresolution microscopy demonstrates that CaV2 channels are concentrated in  
22 densely packed clusters ~300 nm in diameter with active zone proteins Neurexin,  $\alpha$ -Liprin,  
23 SYDE, ELKS, RIMB,  $\alpha$ -Catulin, and MAGI. The CaV2 channels mediate the fusion of vesicles  
24 docked within 100 nm of the dense projection and is colocalized with to the synaptic vesicle  
25 priming protein UNC-13L. By contrast, CaV1 channels are dispersed in the synaptic varicosity  
26 and are coupled to internal calcium stores via the ryanodine receptor. The CaV1 and ryanodine  
27 receptor mediate the fusion of vesicles docked broadly in the synaptic varicosity and are  
28 colocalized with the vesicle priming protein UNC-13S. These distinct synaptic vesicle pools,  
29 released by different calcium channels, could be used to tune the speed, voltage-dependence,  
30 and quantal content of neurotransmitter release.

31

## 32 **Introduction**

33           Presynaptic boutons have an intricate molecular architecture that determines their  
34 activity during synaptic transmission (Ackermann, Waites, & Garner, 2015; Haucke, Neher, &  
35 Sigrist, 2011). The site of vesicle fusion in the presynaptic bouton, called the active zone, is  
36 directly opposed to the ligand-gated ion channels in the postsynaptic membrane. Within the  
37 active zone, scaffolding proteins interact with transsynaptic adhesion molecules and recruit  
38 voltage-gated calcium channels (Südhof, 2012). Synaptic vesicles are tethered, docked and  
39 primed at release sites in the active zone by Unc13 proteins (Neher & Brose, 2018). The  
40 coupling of calcium channels to release sites will determine the transfer function of synapses to  
41 depolarizing inputs (Eggermann, Bucurenciu, Goswami, & Jonas, 2012; Eguchi, Montanaro, le  
42 Monnier, & Shigemoto, 2022; Özçete & Moser, 2021; Rebola et al., 2019). Transfer will depend  
43 on the dynamic properties of the calcium channel, the concentration of calcium at the release  
44 site, and the release probability of the vesicle.

45

46           Voltage-gated calcium channels can be divided into three molecular families: CaV1,  
47 CaV2, and CaV3, each with fundamentally different properties including voltage-sensitive  
48 activation and inactivation (Catterall, Perez-Reyes, Snutch, & Striessnig, 2005; Dolphin, 2021;  
49 Dolphin & Lee, 2020). These classes are primarily associated with tissue-specific functions: In  
50 muscle, CaV1 (L-type) channels mediate contraction and are coupled to internal calcium stores

51 via the ryanodine receptor (RyR). In neurons, CaV2 (P/Q, N, and R-type) channels drive  
52 synaptic transmission. In neurons and excitable cells, CaV3 (T-type) regulate action potential  
53 oscillations and pacemaker frequencies (Dolphin, 2021). These tissue-specific roles are not  
54 exclusive, for example, CaV1 variants are associated with neurotransmitter release in hair cells  
55 (CaV1.3) and photoreceptors (CaV1.4) (Dolphin & Lee, 2020).

56

57 In the nematode *C. elegans*, each class is encoded by a single gene: CaV1 (*egl-19*),  
58 CaV2 (*unc-2*), CaV3 (*cca-1*), and RyR (*unc-68*). In both vertebrates and *C. elegans*, CaV2 is  
59 the main calcium channel for synaptic transmission (J E Richmond, Weimer, & Jorgensen,  
60 2001; R W Tsien, Lipscombe, Madison, Bley, & Fox, 1988; Richard W Tsien & Tsien, 1990).  
61 Nematodes lack voltage-gated sodium channels and neurotransmission is mediated via graded  
62 release (Ping Liu, Chen, & Wang, 2014; Qiang Liu, Hollopeter, & Jorgensen, 2009), and the  
63 frequency of tonic miniature currents ('minis') is severely reduced in *unc-2* mutants, but some  
64 release remains (J E Richmond et al., 2001; Tong et al., 2017). Physiological studies suggest  
65 CaV1 can also contribute to neurotransmission; CaV1 channel blockers reduce tonic minis  
66 (Tong et al., 2017). However, the role of CaV1 channels at synapses is complicated because  
67 CaV1 also contributes to calcium-mediated action potentials in the worm (Qiang Liu, Kidd,  
68 Dobosiewicz, & Bargmann, 2018). Finally, the ryanodine receptor also contributes to  
69 neurotransmission, and is specifically required for multivesicular release (Chen et al., 2017;  
70 Qiang Liu et al., 2005).

71

72 The calcium signal will rapidly dissipate by diffusion. Intracellular calcium is  
73 extremely low (0.05  $\mu\text{M}$ ), and levels required for fusion relatively high (half-maximal 10  $\mu\text{M}$ )  
74 (Courtney, Briguglio, Bradberry, Greer, & Chapman, 2018; Schneggenburger & Neher, 2000).  
75 Free calcium will be further depleted by calcium buffers and calcium pumps (Blaustein, 1988;  
76 Eggermann et al., 2012). The effective range of calcium around a single voltage-gated calcium  
77 channel is calculated to be only 20 nm for evoked fusion, a 'nanodomain' approximately the  
78 diameter of the calcium channel itself (Fedchyshyn & Wang, 2005; Weber et al., 2010). For  
79 synapses to reliably track high frequency action potentials, there must be a large number of  
80 channels to negate the stochastic nature of channel opening, and the channels must be tightly  
81 coupled to the release sites in this nanodomain. Thus, the transfer function not only depends on  
82 the identity of the calcium channel, but also depends on the density of calcium channels and the  
83 distance to the docked vesicle. By contrast, at some synapses calcium 'microdomains' can drive  
84 synaptic vesicle fusion, 80-200 nm from the calcium channels (Eggermann et al., 2012; Vyleta &  
85 Jonas, 2014) suggesting that some calcium signals are more robust and do not require tight  
86 physical coupling. The tuning of the output of the presynapse then ultimately depends on the

87 organization of calcium channels and the proteins that dock vesicles (Eggermann et al., 2012;  
88 Nakamura et al., 2015).

89

90 Vesicle docking and priming at the active zone is mediated by Unc13 homologs  
91 (Dittman, 2019; Neher & Brose, 2018). Unc13 tethers vesicles to the active zone by membrane  
92 interactions of the C2B and C2C domains independent of SNARE proteins (Imig et al., 2014;  
93 Quade et al., 2019). The MUN domain interacts with the SNARE protein syntaxin (Augustin,  
94 Rosenmund, Südhof, & Brose, 1999; Lai et al., 2017; Yang et al., 2015) and promotes the open  
95 state of Unc13 to allow SNARE protein interactions (J E Richmond et al., 2001). Mutants lacking  
96 Unc13 fail to dock and prime synaptic vesicles in worms and in mice (Hammarlund, Palfreyman,  
97 Watanabe, Olsen, & Jorgensen, 2007; Imig et al., 2014; Janet E Richmond, Davis, &  
98 Jorgensen, 1999; Siksou et al., 2009). Unc13 proteins have two structural isoforms (UNC-13L  
99 and UNC-13S in *C. elegans*), which differ by the presence or absence of the C2A domain at the  
100 N-terminus(Dittman, 2019). The active zone protein RIM interacts with the C2A domain to inhibit  
101 homodimerization and activates Unc13 in both vertebrates and worms (Betz et al., 2001; Hu,  
102 Tong, & Kaplan, 2013; H. Liu et al., 2019; Lu et al., 2006; Zhou, Stawicki, Goncharov, & Jin,  
103 2013). The Unc13 isoforms that lack the C2A domain are associated with ELKS proteins in mice  
104 and flies (Böhme et al., 2016; Kawabe et al., 2017).

105

106 Here, we demonstrate using electrophysiology in *C. elegans* that two different classes of  
107 voltage-gated calcium channels, CaV2 (UNC-2) and CaV1 (EGL-19) mediate the release of two  
108 distinct pools of synaptic vesicles. A third calcium channel, the ryanodine receptor (RyR, UNC-  
109 68), functions with CaV1 in vesicle release. Time-resolved electron microscopy in genetic  
110 mutants demonstrates that CaV2 fuses synaptic vesicles at the dense projection of the active  
111 zone and CaV1 and RyR fuse vesicles at lateral sites. Finally, we use super-resolution  
112 fluorescence microscopy to demonstrate that CaV2 is localized with UNC-13L at the dense  
113 projection, and that CaV1 and RyR colocalize with UNC-13S at distal sites. Altogether, we  
114 describe two essential pools of synaptic vesicles: (1) the central pool is localized adjacent to the  
115 dense project, vesicles are docked by UNC-13, and released by a dense cluster of CaV2  
116 channels. (2) The lateral pool of vesicles is broadly distributed, docked by UNC-13S, and  
117 released by dispersed CaV1 and RyR channels.

118

## 119 **Results**

### 120 **Two independent calcium sources at presynapses**

121 The genome of *C. elegans* contains only a single gene for each major voltage-gated  
122 calcium channel class: CaV1 (*egl-19*), CaV2 (*unc-2*), CaV3 (*cca-1*), and a single calcium-gated

123 RyR (*unc-68*), referred to by common name hereafter. Loss of the CaV3 T-type channel does  
124 not affect neurotransmitter release in acetylcholine neurons (H. Liu et al., 2018), so we  
125 investigated null mutations in CaV1, CaV2, and RyR. Null mutants lacking CaV2 (*unc-2(lj1)*) and  
126 RyR (*unc-68(e540)*) are viable, but CaV1 (*egl-19(st556)*) die as embryos due to a loss of  
127 muscle function (Lee, Lobel, Hengartner, Horvitz, & Avery, 1997). Expression of CaV1 using a  
128 muscle-specific promoter rescues viability, hereafter this strain is described as the nervous  
129 system null 'CaV1( $\Delta$ ns)'. This strain can be fully rescued with the addition of a nervous system  
130 rescue of CaV1.

131

132 To determine whether the channels function cooperatively or in parallel, we generated  
133 double mutant combinations of the three channel types. The double mutant lacking CaV1( $\Delta$ ns)  
134 and RyR is viable, and is no worse than the RyR null, consistent with their coupled function.  
135 However, loss of CaV2 with either CaV1 or with RyR resulted in a synthetic lethal interaction  
136 (Table S1). These data suggest that calcium influx from CaV2 acts redundantly and in parallel to  
137 a CaV1-RyR calcium source during neurotransmission. To bypass synthetic lethal interactions,  
138 we rescued viability by expressing CaV2 using a promoter specific for head acetylcholine  
139 neurons (*Punc-17h*) (Hammarlund et al., 2007; Topalidou et al., 2016), suggesting worm viability  
140 requires a few acetylcholine neurons in the head neuropil. This strain lacks CaV2 calcium  
141 channels in the motor neurons of the ventral nerve cord, hereafter referred to as CaV2( $\Delta$ nmj).  
142 Expression of CaV2 in the head restored viability in double mutants with CaV1 or with RyR.  
143 These double mutants exhibit a synthetic paralyzed phenotype. This restoration of viability  
144 confirms that the lethality of the CaV2 and CaV1 or RyR genetic interaction is due to disrupted  
145 neuronal function.

146

#### 147 **CaV2 or CaV1 and ryanodine receptor synaptic vesicle pools**

148 To confirm disrupted neuronal function in calcium channel double mutants, we directly  
149 assayed postsynaptic currents using electrophysiology recordings from body muscle. Miniature  
150 postsynaptic currents ('minis') are caused by the release of neurotransmitter from one or a few  
151 synaptic vesicles (Chen et al., 2017; Q. Liu, 2005). The nematode neuromuscular junction  
152 releases neurotransmitter via graded release (Ping Liu et al., 2014; Qiang Liu et al., 2009) and  
153 the burst of minis drives calcium action potentials in the muscles (P. Liu et al., 2011). The rate of  
154 miniature postsynaptic currents (mPSCs) compared to the wild type (32.5 +/- 3.5 minis/s) is  
155 reduced by ~40% in CaV2 (18.7 +/- 3.9 minis/s), CaV1 (21.2 +/- 2.8 minis/s), and RyR (20.4 +/-  
156 3.5 minis/s) single mutants (Figure 1A). The rate of minis in the CaV1( $\Delta$ ns) RyR double mutant  
157 is similar to each single mutant (19.6 +/- 2 mini/s), supporting the interdependent relationship of  
158 these two channels. The mini rates of CaV2( $\Delta$ nmj) CaV1( $\Delta$ ns) double mutants (12.8 +/- 2.4

159 mini/s) and CaV2( $\Delta$ nmj) RyR double mutants (11.3 +/- 2.1 mini/s) are significantly diminished,  
160 but not completely abolished. This lingering neuronal activity in these strains is likely due to  
161 CaV2 expression from head-rescued CaV2 neurons synapsing onto the muscles (the sublateral  
162 cord motor neurons) or from low-level expression in the ventral cord motor neurons.

163

164 To determine if CaV1 and CaV2 are required for all neurotransmitter release, we blocked  
165 CaV1 acutely using nepadipine (Kwok et al., 2006). Miniature currents in wild-type worms were  
166 reduced by 43% when treated with nepadipine (untreated: 32.5 +/- 3.5 minis/s; nepadipine:  
167 18.4 +/- 2 minis/s). In CaV2(-) null animals, nepadipine almost completely abolished mini  
168 frequency (1.7 +/- 0.6 mini/s). In contrast, nepadipine did not change mini frequency in either  
169 the CaV1( $\Delta$ ns) mutant (20.4 +/- 2.5 mini/s) or the RyR(-) mutant (20.7 +/- 1.3 mini/s) (Figure  
170 1B). We conclude that CaV2( $\Delta$ nmj) is expressed at low levels at neuromuscular junctions and  
171 that all neurotransmitter release at these neuromuscular junctions relies on CaV1 and CaV2.  
172 The mean amplitude of the miniature currents is similar to the wild type in the absence of CaV1  
173 or CaV2 indicating that these mutants do not affect either vesicle size or the postsynaptic  
174 receptor function (Extended Data Figure 1A-D). As previously reported, the mean amplitude of  
175 the RyR loss-of-function mutant is decreased (16.0 +/- 1.8 pA). To determine if this reduction  
176 was from defects in multiquantal release, the mode, or peak value of the miniature current  
177 amplitudes after 1pA binning was taken. The mode values which likely represent single vesicle  
178 fusions, were similar in all genotypes (WT: 10 pA; CaV2 8pA, CaV1 $\Delta$ ns 10pA, RyR 8pA,  
179 CaV2 $\Delta$ nmj/RyR 10pA, CaV2 $\Delta$ nmj/CaV1 $\Delta$ ns 12pA, CaV1 $\Delta$ ns/RyR 10pA) (Extended Data Figure  
180 1E-F), suggesting that internal calcium stores are required for multiquantal events (Chen et al.,  
181 2017; Qiang Liu et al., 2005). Together, these data demonstrate that CaV2 and CaV1 / RyR  
182 channels regulate the release of separate synaptic vesicle pools at neuromuscular junctions.

183

#### 184 **CaV2 and CaV1 mediate fusion of separate pools of synaptic vesicles**

185 The physiology data suggest that CaV2 and CaV1 mediate the release of distinct  
186 synaptic vesicle pools at the same synapse. To demonstrate these calcium channels regulate  
187 synaptic vesicle fusion, “flash-and-freeze” time-resolved electron microscopy was used to  
188 characterize fusing vesicle pools (Watanabe et al., 2013). Transgenic animals expressing  
189 channelrhodopsin in acetylcholine neurons were loaded into a high-pressure freezing chamber,  
190 and stimulated with a 20-ms light pulse to depolarize neurons and activate synaptic calcium  
191 channels. Animals were frozen 50 ms after stimulation; control animals were treated identically  
192 but not stimulated. Frozen samples were fixed by freeze substitution, embedded in plastic and  
193 sectioned for electron microscopy (Watanabe et al., 2013). Docked vesicles are defined as  
194 those in contact with the plasma membrane; docking was segmented blind to treatment and

195 genotype (Figure 2A,B). The distance to the closest dense projection was plotted on the X-axis  
196 (Figure 2C). Decreases in docked vesicles after stimulation were assumed to be the result of  
197 synaptic vesicle fusion, although calcium influx could cause some vesicles to undock and return  
198 to the cytoplasm (Kusick et al., 2020)

199

200 To identify vesicle fusions associated with particular calcium channels, we analyzed the  
201 distribution of docked vesicles in mutant animals. In unstimulated animals, docked vesicles are  
202 clustered around dense projections, although many are observed at lateral regions extending  
203 beyond 100 nm from dense projections. Docked vesicles are uniformly depleted after  
204 stimulation in wild-type animals (Figure 2D). Genetic ablation of CaV2 channels reduced vesicle  
205 fusions adjacent to the dense projection; docked vesicles distal to the dense projection still  
206 fused in response to stimulation (Figure 2E). Mutation of the CaV1 channel reduced fusion  
207 broadly, although significant vesicle fusions were observed within 100 nm of the dense  
208 projection (Figure 2F). Similar to CaV1 mutants, absence of RyR exhibited vesicle fusions  
209 adjacent to the dense projection but reduced fusions greater than 100 nm from the dense  
210 projection (Figure 2G). For these experiments we used the CaV1 hypomorph *egl-19(n582)* and  
211 the CaV1 CaV2 double mutant *egl-19(n582) unc-2(lj1)* is viable. The double mutant of synaptic  
212 vesicles after stimulation (Figure 2H). These data demonstrate that *C. elegans* neuromuscular  
213 junctions have two spatially distinct pools of synaptic vesicles: a central pool dependent on  
214 CaV2 calcium channels and a lateral pool dependent on CaV1 and RyR.

215

## 216 **CaV2 and CaV1 are segregated at synapses**

217 The electron microscopy data suggests that CaV1 and CaV2 are localized to spatially  
218 separate areas of the active zone. To localize calcium channels at synapses at physiological  
219 conditions we tagged the endogenous genes and localized them using fluorescence  
220 microscopy. We performed 3-color imaging using dense projection markers as an anatomical  
221 fiducial at the center of the synapse. Because *C. elegans* synaptic varicosities are less than  
222 1µm in diameter, super-resolution microscopy was required to resolve channel clusters. A small  
223 segment of the dorsal nerve cord, where neuromuscular junctions exist, was imaged, and the  
224 region of imaging was restricted to a narrow band to avoid potential complications by the signal  
225 from CaV1 expression in muscle. To ensure that the pattern of synapses in our fluorescence  
226 images matched the arrangement of neuromuscular junctions, we reconstructed 20 µm of the  
227 dorsal cord. All imaging was conducted on living, acutely anesthetized nematodes.

228

229 Multiple tagging sites were tested for all genes, but in some cases the tags disrupted  
230 function, or the splice isoforms were not expressed in neurons. For all voltage gated calcium

231 channels internal sites within regions of poor conservation were successfully modified  
232 (Extended Figure 2A-C). CaV2 was tagged with HALO (Grimm, Brown, English, Lionnet, &  
233 Lavis, 2017) in the second extracellular loop near the N-terminus (Kurshan et al., 2018;  
234 Schwartz & Jorgensen, 2016).

235

236 To confirm that the pattern of calcium channels in our fluorescence images matched the  
237 arrangement of dense projections in electron micrographs, we reconstructed 20  $\mu\text{m}$  of the  
238 dorsal nerve cord from serial sections (Figure 3A). CaV2 clusters are localized every  $1.10 \pm$   
239  $0.16 \mu\text{m}$  along the dorsal cord, and echoes the distribution of dense projections in the  
240 reconstruction ( $1.02 / \mu\text{m}$ ). To identify proteins associated with CaV2, we tagged multiple active  
241 zone components implicated in scaffolding and release complexes at the dense projection  
242 (Ackermann et al., 2015; Südhof, 2012). Neurexin (*nrx-1*), Magi (*magi-1*), Syde1 (*syd-1*), Liprin-  
243  $\alpha$  (*syd-2*), RIMBP (*rimb-1*), and  $\alpha$ -Catulin (*ctn-1*) were tagged with SkyJan-S. Each of these  
244 proteins is closely associated with CaV2::HALO puncta (Figure 3B).

245

246 In particular, ELKS form distinct, highly punctate clusters at similar intervals along the  
247 dorsal cord ( $1.03 \pm 0.04 \mu\text{m}$ ), and are reliably associated with CaV2 clusters (Figure 3C).  
248 ELKS serves as a synaptic fiducial for CaV2 and CaV1 comparisons. To quantify the distribution  
249 of CaV2 relative to ELKS, an axis was determined using the two cluster centers, and CaV2  
250 localization displacements along the axis to the ELKS cluster center were measured and plotted  
251 as a histogram (Figure 3D). The 95% confidence interval of these distance measurements will  
252 be called the “diameter” of the cluster. CaV2 clusters are larger, 297 nm in diameter, and often  
253 encompass the ELKS cluster (294nm); 62% of ELKS localizations are within a CaV2 cluster  
254 (Figure 4A-C). The CaV2 cluster center is slightly offset from the ELKS cluster (124nm), which  
255 may be due to the positions of the tags on their respective proteins, or because CaV2 and ELKS  
256 tags are on opposite sides of the plasma membrane.

257

258 In contrast to the highly concentrated subsynaptic CaV2 distribution, CaV1 was  
259 distributed mainly as dispersed tiny puncta, further away from the synaptic marker ELKS and  
260 CaV2 (center to center 262nm), was broadly distributed (diameter 869 nm) (Figure 4A,B), and  
261 shares only a 24% overlap with ELKS (Figure 4C). A similar distribution was observed when  
262 CaV1 distribution was measured relative to CaV2, with 24% of CaV1 localizations within the  
263 CaV2 distribution (Figure 4C). This suggests CaV1 is not paired with the dense projection,  
264 instead distributed laterally in the active zone.

265

266 CaV1 is highly expressed in the muscle, to confirm that the CaV1 localizations are



267 presynaptic and not in the muscle or hypoderm, we generated a HALO-tagged CaV1 under the  
268 pan-neuronal synaptotagmin promotor (*Psnt-1*) in the CaV1( $\Delta$ ns) strain, which fully rescued  
269 function (Extended Data 1G). For ease of genetic crosses, we used RIM binding-protein  
270 (RIMBP/RIMB-1) as a dense projection marker. The overexpressed CaV1::HALO tended to be  
271 more punctate than the endogenously tagged protein (Ext Data Figure 3A,B ). However, CaV1  
272 was not colocalized with RIMBP and the distances between clusters similar to the endogenously  
273 tagged gene (center-to-center endogenous CaV1 tag: 262nm; *Psnt-1*:CaV1 tag: 378  
274 nm)(Extended Data 3E). To demonstrate that CaV1 clusters are presynaptic we expressed LIN-  
275 7 / VELI, a potential CaV1 channel scaffold through PDZ domain interactions (Butz, Okamoto, &  
276 Südhof, 1998; Pym et al., 2017), in acetylcholine motor neurons (Extended Data 3C,D). CaV1  
277 and LIN-7 clusters were closely associated, but not associated with RIMBP (Extended Data 3E).  
278 These data suggest that CaV1 is localized at presynaptic boutons in a separate domain from  
279 CaV2 channels.

280

281 If CaV1 and RyR function in the same vesicle fusion pathway, they must be colocalized  
282 (Piggott & Jin, 2021). RyR was tagged with HALO at the N-terminus of the neuronal isoform  
283 (Extended Data Figure 2C) (Marques et al., 2020). RyR localizations were compared to CaV1  
284 localizations and a dense projection marker, in this case neurexin (NRX-1::Skylan-s) for  
285 convenience of genetic crosses (Figure 5A,B). RyR localizations were diffusely distributed, and  
286 lateral to the dense projection (peak-to-peak 393nm; 25 synapses) (Figure 5C). RyR  
287 localizations were tightly correlated with CaV1. 94% of RyR localizations are within 100nm of a  
288 CaV1 localization (Figure 5D). CaV1 exhibited a slightly broader distribution; nevertheless, 82%  
289 of CaV1 localizations are within 100nm of a RyR channel (Figure 5D). The spatial correlation  
290 between CaV1 and RyR are consistent with functional interactions at lateral sites independent  
291 of CaV2 clusters.

292

### 293 **Different UNC-13 isoforms are associated with CaV1 and CaV2**

294 Vesicle docking and SNARE priming requires UNC-13 proteins. Null mutations in *unc-13*  
295 nearly eliminate neurotransmission and vesicle docking in *C. elegans* (Hammarlund et al., 2007;  
296 Janet E Richmond et al., 1999). We edited the *unc-13* locus at the C-terminus to add Skylan-S  
297 to label all splice isoforms (UNC-13all)(Extended Data 2D). UNC-13all was tightly associated  
298 with calcium channels (Figure 6A-C). A high percentage of total UNC-13all localizations were  
299 found within 100nm of CaV2 and CaV1 (92% and 97%, respectively) by nearest-neighbor  
300 analysis (Figure 6D).

301

302 The short isoform UNC-13S lacks the C2A domain, which is required to bind to RIM, has

303 a diffuse distribution at synapses (Hu et al., 2013; Weimer et al., 2006; Zhou et al., 2013) UNC-  
304 13S was edited at its unique N-terminus with Skylan-S. UNC-13S does not colocalize with  
305 CaV2 (peak-to-peak 319nm) but is associated with CaV1 (Figure 7A-C). Nearest neighbor  
306 analysis indicates that 99% of UNC-13S localizations are within 100nm of a CaV1 (Figure 7D),  
307 demonstrating that a specialized isoform of UNC-13 docking machinery is localized to CaV1  
308 calcium channels.

309

## 310 **Discussion**

311 Calcium channel classes tend to be associated with specific tissue functions: CaV2 (N,  
312 P/Q, R-type) with synaptic transmission, and CaV1 (L-type) channels with muscle contraction.  
313 Here, we demonstrate that both CaV2 and CaV1 channels drive vesicle fusion at *C. elegans*  
314 neuromuscular junctions and mediate the release of different synaptic vesicle pools. In  
315 electrophysiological assays, these pools are genetically separable and perfectly  
316 complementary. Electron microscopy using flash-and-freeze stimulation demonstrated that  
317 CaV2 channels fuse vesicles near the dense projection, whereas CaV1 channels drove vesicle  
318 fusion at lateral sites in the same synapses. Super-resolution imaging indicates that CaV2  
319 channels are tightly associated with the active zone proteins Neurexin,  $\alpha$ -Liprin, ELKS, RIMBP.  
320 In addition, CaV2 is associated with the long isoform of the docking and priming protein UNC-  
321 13L. By contrast, CaV1 is dispersed in the synaptic varicosity and is associated with the short  
322 isoform UNC-13S. Finally, the localization and functions of CaV1 in synaptic transmission are  
323 spatially and functionally coupled to the ryanodine receptor, which regulates calcium release  
324 from internal stores (Figure 8).

325

## 326 **CaV1 functions at synapses**

327 In *C. elegans* there is only a single L-type channel, encoded by the *egl-19* gene and  
328 primarily plays a role in muscle development and contraction (Lee et al., 1997). Recent data  
329 suggests that EGL-19 can also generate calcium action potentials in some neurons (Qiang Liu  
330 et al., 2018), and thereby substitute for the absence of voltage-gated sodium channels in  
331 nematodes. However, L-type channel inhibitors do not affect evoked release in the worm, but  
332 rather decrease spontaneous fusions (Tong et al., 2017). We demonstrate that null mutations in  
333 *egl-19* have reduced rates of tonic miniature currents, are presynaptically localized, and are  
334 involved in fusions of a specific sub-pool of synaptic vesicles. Together these data suggest that  
335 this L-type channel is acting to mediate fusion of synaptic vesicles.

336

337 The participation of the CaV1 L-type channel EGL-19 in synaptic transmission in *C.*  
338 *elegans* is unusual but not unprecedented. L-type channels were originally characterized as

339 muscle calcium channels. However, CaV1 channels also play a primary role in synaptic vesicle  
340 fusion at graded sensory synapses: CaV1.3 drives neurotransmission in hair cells and CaV1.4  
341 acts at ribbon synapses in photoreceptors (Schmitz & Witkovsky, 1997; S. Y. Zhang, Robertson,  
342 Yates, & Everett, 1999). CaV1.2 and CaV1.3 are also expressed broadly in the brain and  
343 function in dendritic spines during synaptic plasticity (Hell et al., 1996, 1993; Nanou & Catterall,  
344 2018), although possible presynaptic roles remain largely unexplored.

345

### 346 **Multiple calcium channels - coupling and voltage-dependence**

347 Although based on the physiological data alone, it was possible that CaV1 and CaV2  
348 channels were functioning at separate synapses, the electron microscopy and fluorescence  
349 experiments demonstrate that these channels are functioning at the same synaptic varicosity.  
350 Participation of multiple classes of calcium channels at the same synapse could tune the  
351 dynamics of neurotransmission. Differences in voltage-dependent activation, inactivation,  
352 clustering, or distance to docked vesicles could regulate synchronous or asynchronous release  
353 (Dolphin, 2021).

354

355 One important difference is that CaV1 channels inactivate more slowly than CaV2  
356 channels (Naranjo, Wen, & Brehm, 2015; Yu, Yuan, Westenbroek, & Catterall, 2018). CaV1.3  
357 and CaV1.4 mediate graded release in auditory hair cells and photoreceptors, respectively.  
358 Slow inactivation of these channels enables graded neurotransmitter release (McRory et al.,  
359 2004; Platzer et al., 2000). The *C. elegans* CaV1 channel EGL-19 also exhibits slow inactivation  
360 *in vivo* (Lainé, Ségor, Zhan, Bessereau, & Jospin, 2014), which likely contributes to tonic  
361 miniature currents (H. Liu et al., 2018). These attributes may also terminate neurotransmission  
362 in motor neurons; calcium influx through EGL-19 is specifically coupled to repolarization via  
363 SLO-2 BK potassium channels (Ping Liu et al., 2014).

364

365 The most profound difference observed at *C. elegans* neuromuscular junctions is that  
366 they are differentially localized: CaV2 is localized to a large cluster at the dense projection,  
367 CaV1 is distributed broadly in the synapse. Vesicle pools can be assayed as tightly coupled or  
368 loosely coupled to calcium channels based on sensitivity to EGTA (Dittman & Ryan, 2019;  
369 Eggermann et al., 2012). At *C. elegans* neuromuscular junctions, UNC-13L mediates tight  
370 coupling (EGTA-insensitive), whereas UNC-13S mediates loose coupling (EGTA-sensitive) (Hu  
371 et al., 2013). Consistent with these findings, our data indicate UNC-13L is localized to dense  
372 projections along with potentially dozens of CaV2 channels. The CaV2 channel mediates the  
373 release of vesicles tightly associated with the dense projection, but cannot fuse vesicles greater  
374 than 100 nm from the dense projection. In contrast to CaV2, CaV1 channels are dispersed

375 across the synapse and frequently at solitary localizations. Nevertheless, CaV1 channels can  
376 drive fusion of a very large distribution of docked vesicles, extending 500 nm from the dense  
377 projection.

378

### 379 **RyR**

380 The requirement of CaV1 for the fusion of this distal pool of vesicles is likely to be  
381 mediated by the ryanodine receptor rather than by CaV1 directly. Calcium influx from CaV1  
382 channels stimulates the release of calcium from the endoplasmic reticulum via the ryanodine  
383 receptor (Bouchard, Pattarini, & Geiger, 2003). In skeletal muscle, CaV1.1 is physically coupled  
384 to RyR1 and voltage-sensing by the calcium channel can gate the ryanodine receptor in the  
385 absence of extracellular calcium (Schneider, 1994). In neurons, it is unclear if CaV1 channels  
386 are physically coupled to RYRs. In *C. elegans*, there is no physical link between CaV1 and the  
387 RyR since depolarizations in the absence of calcium do not elicit synaptic vesicle release (Q.  
388 Liu, 2005). Data demonstrated here indicate a spatial and functional link. Nearest neighbor  
389 analysis indicates that essentially all RyR localizations are within 100 nm of a CaV1 channel,  
390 and the electrophysiology and electron microscopy demonstrate that they mediate fusion of the  
391 same pool of vesicles. Ryanodine receptors are also found at vertebrate presynapses  
392 (Bouchard et al., 2003); further work is required to demonstrate a role for ryanodine receptors in  
393 synaptic vesicle release at vertebrate synapses.

394

### 395 **Summary**

396 In summary, we find that different classes of calcium channels CaV2 and CaV1  
397 colocalized with different isoforms of docking and priming proteins, UNC-13L and UNC-13S,  
398 respectively, at the *C. elegans* neuromuscular junction. These proteins are localized at different  
399 sites and mediate fusion of different pools of synaptic vesicles.

400

401 Cooperation between calcium channel classes may be widespread. Immunofluore-  
402 scence experiments indicate that both CaV1 and CaV2 channels are localized together at the  
403 same neuromuscular junctions in the fly (Krick et al., 2021). Beyond invertebrates, mouse CaV1  
404 and CaV2 channels function together at neuromuscular junctions (Katz, Ferro, Weisz, & Uchitel,  
405 1996; Urbano & Uchitel, 1999) Finally, pharmacological experiments suggest that CaV1 and  
406 CaV2 channels function together in GABA neurons in the central nervous system (Goswami,  
407 Bucurenciu, & Jonas, 2012; Rey et al., 2020). Recent work indicates that CaV1 channels and  
408 RyR2 function together and colocalize at junctions in the cell body of hippocampal neurons  
409 (Sahu et al., 2019). It is likely that CaV1 mediates ryanodine receptor function at vertebrate  
410 synapses as well. Finally, the presence of analogous isoforms the UNC-13 proteins, Munc13-1

411 and bMunc13-2, function together at the same synapses, suggest that this organization of  
412 synapses into separately regulated pools of synaptic vesicles may be general.  
413

## 414 **Methods**

### 415 **Rescue of Lethal Calcium Channel Mutants**

416 Lethal *CaV1/egl-19(st556)* animals were rescued by Mos-mediated transgenes  
417 (Frøkjær-Jensen et al., 2014, 2008). An *egl-19* minigene was constructed from cDNA and  
418 portions of gDNA containing small unconserved introns to aid expression. The first exons 1-4  
419 are cDNA, followed by gDNA of exon 5-9, and cDNA of exon 10-17. The minigene was placed  
420 downstream from a muscle *Pset-18* promoter and inserted directly into the genome by MosSCI  
421 (Frøkjær-Jensen et al., 2008). The resulting construct oxTi1047 was crossed into *CaV1/egl-*  
422 *19(st556)* bearing animals. A second copy of the *egl-19* minigene was placed after a neuronal  
423 *Psnt-1* promoter and carried into the genome by miniMos (Frøkjær-Jensen et al., 2014). The  
424 resulting oxTi1049 construct was crossed into the muscle-rescued *CaV1/egl-19(st556)* animals.

425 Lethal double mutants of *CaV2-RyR (unc-2(lj1);unc-68 e540)* and *CaV2-CaV1(unc-2*  
426 *lj1;egl-19 st556)* were rescued by an extrachromosomal array expressing *SNAP::CaV2/unc-2*  
427 cDNA in a minimum set of acetylcholine head neurons, using a previously described truncated  
428 *unc-17* promoter (Hammarlund et al., 2007; Topalidou et al., 2016). The array oxEx2096 was  
429 generated in *unc-2(lj1)* strain AQ130 and crossed to *RyR/unc-68(e540)* or *CaV1/egl-*  
430 *19(st556);oxTi1047* bearing animals. The resulting strains are lethal without the presence of  
431 oxEx2096[*Punc-17::SNAP::unc-2*] and were used in electrophysiology experiments.

432

### 433 **Generation of CaV2::HALO by CRISPR/cas9**

434 *CaV2* was tagged by CRISPR-mediated insertion of HALO coding DNA into the *unc-2*  
435 endogenous genomic locus. A DNA mix containing 1) PCR-generated DNA repair template that  
436 includes the HALO tag with an embedded *Cbr-unc-119(+)* cassette flanked by loxP sites and  
437 33bp homology arms to the cut site, 2) plasmid DNA that directs expression of Cas9 and an  
438 sgRNA (Schwartz & Jorgensen, 2016), and 3) an inducible negative selection plasmid directing  
439 expression of a histamine-gated chloride channel in neurons, pNP403 (Pokala, Liu, Gordus, &  
440 Bargmann, 2014) was injected into the gonads of young adult EG6207[*unc-119(ed3)*] animals  
441 (Maduro & Pilgrim, 1995; Schwartz & Jorgensen, 2016; X. Zhang et al., 2015). Transgenic  
442 animals were selected for expression of *unc-119(+)*, and extrachromosomal-array bearing  
443 animals were selected against by addition of histamine to the media. The loxP::*Cbr-*  
444 *unc-119(+):loxP* region of the insertion was excised by injecting pDD104[*Peft-3::Cre*] and  
445 identifying *unc-119(-)* animals (Dickinson, Ward, Reiner, & Goldstein, 2013). The modified locus  
446 introduces HALO-tag within an unconserved region in the second extracellular loop of *CaV2*  
447 encoding UNC-2a. The resulting strain EG9823[*unc-119(ed3); unc-2(ox672[HALO])*] was  
448 subsequently used to generate CRISPR-mediated insertions of SKYLAN-S tags.

449

## 450 **Generation of Super-Resolution Tags by CRISPR/cas9**

451 Tags for other genes, including *egl-19*, *unc-68*, *elks-1*, *nrx-1*, *rimb-1*, *elks-1*, *syd-2*, *syd-1*, *magi-*  
452 *1*, *ctn-1*, *unc-13*, and *unc-13b* were constructed as previously described (Schwartz &  
453 Jorgensen, 2016). A single plasmid containing sgRNA and the repair template, composed of  
454 57bp homology arms and SKYLAN-S (X. Zhang et al., 2015) containing a loxP::*Cbr-*  
455 *unc-119(+)*::loxP, was appended by SapTrap plasmid assembly. Each assembled plasmid was  
456 mixed with plasmids to express Cas9 in the germline, and HisCl- in neurons, and injected into  
457 the gonads of young adult EG9823 animals. After selecting for *unc-119(+)* and selecting against  
458 extrachromosomal arrays by histamine application, animals were injected with  
459 pDD104[Peft-3::Cre], selected for excision of loxP::*Cbr-unc-119(+)*::loxP, and outcrossed once  
460 before analysis by super-resolution microscopy.

461

### 462 **Strains:**

463 All strains were maintained at 22C on standard NGM media seeded with OP50.

### 464 **Electrophysiology strains**

465 **N2** (wild-type).

466 **EG9034:** *oxTi1047[Pset-18::egl-19b::let-858 3'utr] II; egl-19(st556)*

467 **AQ130:** *unc-2(lj1) X*

468 **CB540:** *unc-68(e540) V*

469 **EG9405:** *unc-68(e540) V; unc-2(lj1) X; oxEx2097[Punc-17h::SNAP::unc-2]*

470 **EG9406:** *unc-2(lj1) oxTi1047[Pset-18::egl-19b::let-858 3'utr] II; egl-19(st556)IV; unc-2(lj1) X;*

471 *oxEx2097[Punc-17h::SNAP::unc-2]*

472 **EG8827:** *egl-19(st556)IV; unc-68(e540) V; oxTi1047[Pset-18::egl-19b::let-858 3'utr] II;*

### 473 **Electron microscopy strains**

474 **EG5793:** *oxSi91[Punc-17::ChIEF::mCherry::unc-54UTR unc-119(+)] II; unc-119(ed9) III*

475 **EG6584:** *oxSi91[Punc-17::ChIEF::mCherry::unc-54UTR unc-119(+)] II; unc-2(lj1) X*

476 **EG6586:** *oxSi91[Punc-17::ChIEF::mCherry::unc-54UTR unc-119(+)] II; egl-19(n582) IV; unc-*

477 *2(lj1) X.*

478 **EG6587:** *oxSi91[Punc-17::ChIEF::mCherry::unc-54UTR unc-119(+)] II; unc-68(e540) V*

479 **EG6585:** *oxSi91[Punc-17::ChIEF::mCherry::unc-54UTR unc-119(+)] II; egl-19(n582) IV*

### 480 **Single molecule localization strains**

481 **EG9823:** *unc-2(ox672[HALO::unc-2]) X unc-119(ed3) III*

482 **EG9617:** *elks-1(ox747[skylan-s]), egl-19(ox728[SNAP]) IV; unc-2(ox672[HALO]) X*

483 **EG9667:** *egl-19(ox728[SNAP]), elks-1(ox747[skylan-s]) IV unc-68(ox721[HALO]) V*

484 **EG9722:** *unc-2(ox672[HALO]) X; egl-19(ox728[SNAP]) IV; unc-44(ox802[skylan-s]) IV*

485 **EG9418:** *egl-19(st556) IV; ox704[skylan-s::rimb-1] III; oxTi1047[Pset-18::egl-*  
486 *19b::let858utr; HygroR(+)] II; oxTi1055[Psnt-1::HALO::egl-19b; NeoR(+)] II; unc-*  
487 *44(ox708[unc-44::snap]) IV*  
488 **EG10094:** *oxTi1055[Psnt-1::HALO::egl-19b; NeoR(+)] oxTi1047[Pset-18::egl-19b::let858utr;*  
489 *HygroR(+)] II ; unc-119(ed3) III rimb-1(ox704[skylan-s]) III ; egl-19(st556) IV ; oxEx2223[Punc-*  
490 *129::lin-7::SNAPf]*  
491 **EG9723:** *unc-2(ox672[HALO]) X; egl-19(ox728[SNAP]) IV; unc-13(ox748[skylan-s]) I*  
492 **EG9782:** *unc-13(ox814[SKYLAN-S(loxP)]) I; unc-2(ox672[HALO]) X; egl-19(ox728[SNAP]) IV*  
493 **EG9588:** *egl-19(ox728[SNAP]) IV nrx-1(ox719[skylan-s]) V unc-2(ox672[HALO]) X*  
494 **EG9475:** *oxIs322[CB-unc-119(+)] Pmyo-2::mCherry::histone Pmyo-3::mCherry::histone II unc-*  
495 *119(ed3) III; rimb-1(ox704[skylan-s]) III; egl-19(ox728[snap]) IV unc-2(ox672[HALO::]) X*  
496 **EG9476:** *ctn-1d(ox727[skylan-s]) I; oxIs322[CB-unc-119(+)] Pmyo-2::mCherry::histone Pmyo-*  
497 *3::mCherry::histone II; unc-119(ed3) III; egl-19(ox728[SNAP]) IV; unc-2(ox672[HALO]) X*  
498 **EG9425:** *unc-119(ed3) III; unc-2(ox672[HALO]), syd-2(ox715[skylan-s(loxP::Runc-119::loxP)])*  
499 *X*  
500 **EG10095:** *syd-1(ox723[skylan-s(loxP::Runc-119::loxP)]) II; unc-119(ed3) III; unc-*  
501 *2(ox672[HALO]) X*  
502 **EG10096:** *unc-119(ed3) III; egl-1-19(ox728[snap]), magi-1(ox755[skylan-s(loxP::Rcb-unc-*  
503 *119::loxP)]) IV; unc-2(ox672[HALO]) X*

504

### 505 **Single Molecule Localization Microscopy**

506 Super-resolution images were recorded with a Vutara SR 352 (Bruker Nanosurfaces, Inc.,  
507 Madison, WI) commercial microscope based on single molecule localization biplane technology  
508 (Juetter et al., 2008; Mlodzianoski, Juetter, Beane, & Bewersdorf, 2009). *C. elegans* expressing  
509 HALO- tagged proteins (Encell, 2013; Mollwitz et al., 2012) were stained for two hours in 50µM  
510 of HTL-JF646, and 50µM of STL-JF549cp, STL-JF549, or STL-JF549pa (Gift from Luke Lavis,  
511 Janelia Farms; (Grimm et al., 2017, 2015)). Early super-resolution experiments were conducted  
512 with JF549-STL or PA-JF549-STL, we later found that a new cell permeable variant cp-JF549-  
513 STL improved labeling of channels. Animals were recovered 12 hours at 15degC on agar  
514 seeded with OP50 bacteria. Live intact animals were anesthetized in 25mM NaN<sub>3</sub> and regions  
515 of their dorsal cords that were positioned directly against the cover glass and away from the  
516 intestine were imaged with 640nm excitation power of 10kW/cm<sup>2</sup>, or 549nm excitation power of  
517 5kW/cm<sup>2</sup> SKYLAN-S was imaged by 488nm excitation at 2kW/cm<sup>2</sup>, while photoactivated by  
518 0.37mW/cm<sup>2</sup> 405nm light. Images were recorded using a 60x/1.2 NA Olympus water immersion  
519 objective and Hamamatsu Flash4 V1 sCMOS, or 60x/1.3 NA Silicon immersion objective and



520 Orca Fusion BT SCMOS camera with gain set at 50 and frame rate at 50 Hz. Data was  
521 analyzed by the Vutara SRX software (version 7.0.0rc39). Single molecules were identified by  
522 their brightness frame by frame after removing the background. Identified molecules were  
523 localized in three dimensions by fitting the raw data in a 12x12-pixel region of interest centered  
524 around each particle in each plane with a 3D model function that was obtained from recorded  
525 bead data sets. Fit results were filtered by a density based denoising algorithm to remove  
526 isolated particles. The experimentally achieved image resolution of 40nm laterally (x,y) and 70  
527 nm axially (in z) was determined by Fourier ring correlation. Localizations were rendered as  
528 80nm.

529

### 530 **SML Analysis**

531 Localization data was exclusively collected from the dorsal nerve cord, which contains  
532 axons and synapses but no neuronal soma. We performed a 3D reconstruction of *C. elegans*  
533 dorsal nerve cord to inform region of interest selection from fluorescent images. The orientation  
534 of dorsal cord synapses is predictable. Excitatory acetylcholine neurons and inhibitory GABA  
535 neurons synapse onto muscle arms (Figure 3A). These connections are near the edges of the  
536 cord bundle. Thus, the roll of the animal affects the orientation of the synapse; en face or axial.

537 For single molecule localization experiments, animals were rolled to ensure en face  
538 orientation of synapses. Synapses that were in focus and en face were analyzed. The average  
539 size of a synapse from the dorsal nerve cord is 579.7nm (SEM +/- 16nm). Thus, super-  
540 resolution analysis regions of interest were narrowed to localizations within 700nm of the dense  
541 projection marker. Localization position data was flattened in the z-dimension due to chromatic  
542 aberrations. A script was used to calculate the center of each probe. To compare the distribution  
543 of probe A to probe B, an angle between the two clusters centers was calculated. The  
544 distribution distances were calculated by measuring the distance along the center-to-center axis  
545 from a probe B to the center of cluster A, and cluster B. Nearest neighbor analysis was done  
546 with knnsearch. Distribution center and range or "diameter" were reported as (mean , 95%CI).

547

### 548 **Electrophysiology**

549 All electrophysiological experiments were completed with young adult hermaphrodites. The  
550 animals were immobilized and dissected as previously described (Ping Liu, Chen, Mailler, &  
551 Wang, 2017). Worm preparation was bathed with an extracellular solution containing (in mM)  
552 NaCl 140, KCl 5, CaCl<sub>2</sub> 0.5, MgCl<sub>2</sub> 5, dextrose 11 and HEPES 5 (pH 7.2). Spontaneous  
553 postsynaptic currents (PSCs) at neuromuscular junction were recorded at a holding voltage of -  
554 60 mV with a pipette solution containing (in mM) NaCl 140, KCl 5, CaCl<sub>2</sub> 5, MgCl<sub>2</sub> 5, dextrose  
555 11 and HEPES 5 (pH 7.2). The classic whole-cell recordings were performed with a Multiclamp

556 700B amplifier (Molecular Devices, Sunnyvale, CA, USA) and the Clampex software (version  
557 10, Molecular Devices). Data were filtered at 2 kHz and sampled at 10 kHz. Nemadipine-A  
558 (Sigma-Aldrich) was first dissolved in DMSO to make frozen stock solution (10mM), and was  
559 diluted to a final concentration of 10  $\mu$ M in extracellular solution before use. Animals were  
560 treated for 5 minutes. The frequency and amplitude of minis were quantified with MiniAnalysis  
561 (Synaptosoft, Decatur, GA, USA). The amplitudes of evoked currents were quantified using  
562 Clampfit (version 10, Molecular Devices, Sunnyvale, CA, USA)

563

#### 564 **Flash and Freeze Electron Microscopy**

565 Electron microscopy was performed as previously described (Watanabe et al., 2013).  
566 Freezing was performed on a Leica EMpact2 (Leica, Wetzlar, Germany). To stimulate  
567 neurotransmission animals were exposed to blue (488nm) LED light for 20ms and frozen 50ms  
568 later. 33nm serial sections were taken and imaged using a Hitachi H-7100 transmission electron  
569 microscope equipped with a Gatan Orius digital camera (Gatan, Pleasanton, CA). Micrographs  
570 were analyzed in ImageJ using a program for morphological analysis of synapses (Watanabe,  
571 Davis, Kusick, Iwasa, & Jorgensen, 2020). Scripts available at:

572 <https://github.com/shigekiwatanabe/SynapsEM>

573

#### 574 **Dorsal Nerve Cord Reconstruction**

575 100nm thickness serial sections were imaged using JEOL JEM-1400 (JEOL, Peabody, MA)  
576 then annotated and assembled using TrackEM2 in FIJI (Cardona et al., 2012). Specifically, a  
577 wireframe was fit through each process that was suspected to be in the previous micrograph.  
578 Then an outline of the plasma membrane of each process was drawn. We analyzed several  
579 criteria to more specifically determine the specific process name and type: the morphology of  
580 each process and compared to previously published data (J.G. White, E. Southgate, J.N.  
581 Thomson, & S. Brenner, 1986), and the number of synapses. These data allow us to determine  
582 the identity of a process with some certainty.

583

#### 584 **Acknowledgements**

585 We thank Lexy von Diezmann for development of Proberuler. We thank Luke Lavis for providing  
586 all Janelia Fluor dyes (JF Dyes). We thank the Caenorhabditis Genetics Center (CGC) for  
587 maintaining and distributing strains to the *C. elegans* community. We thank Patrick McEachern,  
588 Matthew Rich, Jessica Vincent and M. Wayne Davis for their critical reviews of this manuscript.  
589 EMJ is an investigator at Howard Hughes Medical Institute.

590

#### 591 **FUNDING**

592 **Erik Jorgensen**

593 National Science Foundation NeuroNex 2014862

594 National Institute of Health NIH NINDS 5R01NS034307

595

596 **Sean Merrill**

597 NIH F31 NRSA Predoctoral Fellows grant #1F31NS084826

598

599 **Zhao-wen Wang**

600 National Institute of Health NIH R01MH085927 and R01NS109388

601

602 **Author Contributions**

603 BDM SAM EMJ Wrote manuscript

604 SAM SW BDM EMJ Designed experiments

605 SW SAM EMJ Conceived of the project

606 PL Performed electrophysiology

607 SAM BDM Performed single molecule localization microscopy

608 BDM LVD designed Proberuler

609 BDM SAM Analyzed single molecule localization data

610 SAM AC Performed genetic crosses

611 SAM AC BDM cloned plasmids

612 SAM BDM Generated transgenic animals

613 SW Performed and analyzed time resolved electron microscopy

614 BDM AS MS annotated serial reconstruction

615 MS Performed serial reconstruction electron microscopy

## 616 References

- 617 Ackermann, F., Waites, C. L., & Garner, C. C. (2015). Presynaptic active zones in invertebrates  
618 and vertebrates. *EMBO Reports*, 16(8). <https://doi.org/10.15252/embr.201540434>
- 619 Augustin, I., Rosenmund, C., Südhof, T. C., & Brose, N. (1999). Munc13-1 is essential for fusion  
620 competence of glutamatergic synaptic vesicles. *Nature*, 400(6743), 457–461.  
621 <https://doi.org/10.1038/22768>
- 622 Betz, A., Thakur, P., Junge, H. J., Ashery, U., Rhee, J.-S., Scheuss, V., ... Brose, N. (2001).  
623 Functional Interaction of the Active Zone Proteins Munc13-1 and RIM1 in Synaptic Vesicle  
624 Priming. *Neuron*, 30(1), 183–196. [https://doi.org/https://doi.org/10.1016/S0896-](https://doi.org/https://doi.org/10.1016/S0896-6273(01)00272-0)  
625 [6273\(01\)00272-0](https://doi.org/10.1016/S0896-6273(01)00272-0)
- 626 Blaustein, M. P. (1988). Calcium transport and buffering in neurons. *Trends in Neurosciences*,  
627 11(10), 438–443. [https://doi.org/https://doi.org/10.1016/0166-2236\(88\)90195-6](https://doi.org/https://doi.org/10.1016/0166-2236(88)90195-6)
- 628 Böhme, M. A., Beis, C., Reddy-Alla, S., Reynolds, E., Mampell, M. M., Grasskamp, A. T., ...  
629 Sigrist, S. J. (2016). Active zone scaffolds differentially accumulate Unc13 isoforms to tune  
630 Ca<sup>2+</sup> channel-vesicle coupling. *Nature Neuroscience*, 19(10), 1311–1320.  
631 <https://doi.org/10.1038/nn.4364>
- 632 Bouchard, R., Pattarini, R., & Geiger, J. D. (2003). Presence and functional significance of  
633 presynaptic ryanodine receptors. *Progress in Neurobiology*, 69(6), 391–418.  
634 [https://doi.org/https://doi.org/10.1016/S0301-0082\(03\)00053-4](https://doi.org/https://doi.org/10.1016/S0301-0082(03)00053-4)
- 635 Butz, S., Okamoto, M., & Südhof, T. C. (1998). A Tripartite Protein Complex with the Potential to  
636 Couple Synaptic Vesicle Exocytosis to Cell Adhesion in Brain. *Cell*, 94(6), 773–782.  
637 [https://doi.org/https://doi.org/10.1016/S0092-8674\(00\)81736-5](https://doi.org/https://doi.org/10.1016/S0092-8674(00)81736-5)
- 638 Cardona, A., Saalfeld, S., Schindelin, J., Arganda-Carreras, I., Preibisch, S., Longair, M., ...  
639 Douglas, R. J. (2012). TrakEM2 Software for Neural Circuit Reconstruction. *PLoS ONE*,  
640 7(6), e38011. <https://doi.org/10.1371/journal.pone.0038011>
- 641 Catterall, W. A., Perez-Reyes, E., Snutch, T. P., & Striessnig, J. (2005). International Union of  
642 Pharmacology. XLVIII. Nomenclature and Structure-Function Relationships of Voltage-  
643 Gated Calcium Channels. *Pharmacological Reviews*, 57(4), 411.  
644 <https://doi.org/10.1124/pr.57.4.5>
- 645 Chen, B., Liu, P., Hujber, E. J., Li, Y., Jorgensen, E. M., & Wang, Z.-W. (2017). AIP limits  
646 neurotransmitter release by inhibiting calcium bursts from the ryanodine receptor. *Nature*  
647 *Communications*, 8(1), 1380. <https://doi.org/10.1038/s41467-017-01704-z>
- 648 Courtney, N. A., Briguglio, J. S., Bradberry, M. M., Greer, C., & Chapman, E. R. (2018).  
649 Excitatory and Inhibitory Neurons Utilize Different Ca<sup>2+</sup> Sensors and Sources to  
650 Regulate Spontaneous Release. *Neuron*, 98(5), 977-991.e5.  
651 <https://doi.org/10.1016/j.neuron.2018.04.022>
- 652 Dickinson, D. J., Ward, J. D., Reiner, D. J., & Goldstein, B. (2013). Engineering the  
653 *Caenorhabditis elegans* genome using Cas9-triggered homologous recombination. *Nature*  
654 *Methods*, 10(10), 1028–1034. <https://doi.org/10.1038/nmeth.2641>
- 655 Dittman, J. S. (2019). Unc13: a multifunctional synaptic marvel. *Current Opinion in*  
656 *Neurobiology*, 57, 17–25. <https://doi.org/https://doi.org/10.1016/j.conb.2018.12.011>
- 657 Dittman, J. S., & Ryan, T. A. (2019). The control of release probability at nerve terminals. *Nature*  
658 *Reviews Neuroscience*, 20(3), 177–186. <https://doi.org/10.1038/s41583-018-0111-3>
- 659 Dolphin, A. C. (2021). Functions of Presynaptic Voltage-gated Calcium Channels. *Function*,  
660 2(1), zqaa027. <https://doi.org/10.1093/function/zqaa027>
- 661 Dolphin, A. C., & Lee, A. (2020). Presynaptic calcium channels: specialized control of synaptic  
662 neurotransmitter release. *Nature Reviews Neuroscience*, 21(4), 213–229.  
663 <https://doi.org/10.1038/s41583-020-0278-2>
- 664 Eggermann, E., Bucurenciu, I., Goswami, S. P., & Jonas, P. (2012). Nanodomain coupling  
665 between Ca<sup>2+</sup> channels and sensors of exocytosis at fast mammalian synapses. *Nature*  
666 *Reviews Neuroscience*, 13(1), 7–21. <https://doi.org/10.1038/nrn3125>
- 667 Eguchi, K., Montanaro, J., le Monnier, E., & Shigemoto, R. (2022). The Number and Distinct  
668 Clustering Patterns of Voltage-Gated Calcium Channels in Nerve Terminals. *Frontiers in*

- 669 *Neuroanatomy*, 16. Retrieved from  
670 <https://www.frontiersin.org/article/10.3389/fnana.2022.846615>
- 671 Encell, L. P. (2013). Development of a Dehalogenase-Based Protein Fusion Tag Capable of  
672 Rapid, Selective and Covalent Attachment to Customizable Ligands. *Current Chemical*  
673 *Genomics*, 6(1), 55–71. <https://doi.org/10.2174/1875397301206010055>
- 674 Fedchyshyn, M. J., & Wang, L.-Y. (2005). Developmental Transformation of the Release  
675 Modality at the Calyx of Held Synapse. *The Journal of Neuroscience*, 25(16), 4131.  
676 <https://doi.org/10.1523/JNEUROSCI.0350-05.2005>
- 677 Frøkjær-Jensen, C., Davis, M. W., Sarov, M., Taylor, J., Flibotte, S., LaBella, M., ... Jorgensen,  
678 E. M. (2014). Random and targeted transgene insertion in *Caenorhabditis elegans* using a  
679 modified Mos1 transposon. *Nature Methods*, 11(5), 529–534.  
680 <https://doi.org/10.1038/nmeth.2889>
- 681 Frøkjær-Jensen, C., Wayne Davis, M., Hopkins, C. E., Newman, B. J., Thummel, J. M., Olesen,  
682 S.-P., ... Jorgensen, E. M. (2008). Single-copy insertion of transgenes in *Caenorhabditis*  
683 *elegans*. *Nature Genetics*, 40(11), 1375–1383. <https://doi.org/10.1038/ng.248>
- 684 Goswami, S. P., Bucurenciu, I., & Jonas, P. (2012). Miniature IPSCs in Hippocampal Granule  
685 Cells Are Triggered by Voltage-Gated Ca<sup>2+</sup> Channels via  
686 Microdomain Coupling. *The Journal of Neuroscience*, 32(41), 14294.  
687 <https://doi.org/10.1523/JNEUROSCI.6104-11.2012>
- 688 Grimm, J. B., Brown, T. A., English, B. P., Lionnet, T., & Lavis, L. D. (2017). *Synthesis of*  
689 *Janelia Fluor HaloTag and SNAP-Tag Ligands and Their Use in Cellular Imaging*  
690 *Experiments*. [https://doi.org/10.1007/978-1-4939-7265-4\\_15](https://doi.org/10.1007/978-1-4939-7265-4_15)
- 691 Grimm, J. B., English, B. P., Chen, J., Slaughter, J. P., Zhang, Z., Revyakin, A., ... Lavis, L. D.  
692 (2015). A general method to improve fluorophores for live-cell and single-molecule  
693 microscopy. *Nature Methods*, 12(3), 244–250. <https://doi.org/10.1038/nmeth.3256>
- 694 Hammarlund, M., Palfreyman, M. T., Watanabe, S., Olsen, S., & Jorgensen, E. M. (2007). Open  
695 Syntaxin Docks Synaptic Vesicles. *PLOS Biology*, 5(8), e198-. Retrieved from  
696 <https://doi.org/10.1371/journal.pbio.0050198>
- 697 Haucke, V., Neher, E., & Sigrist, S. J. (2011). Protein scaffolds in the coupling of synaptic  
698 exocytosis and endocytosis. *Nature Reviews Neuroscience*, 12(3), 127–138.  
699 <https://doi.org/10.1038/nrn2948>
- 700 Hell, J. W., Westenbroek, R. E., Breeze, L. J., Wang, K. K., Chavkin, C., & Catterall, W. A.  
701 (1996). N-methyl-D-aspartate receptor-induced proteolytic conversion of postsynaptic class  
702 C L-type calcium channels in hippocampal neurons. *Proceedings of the National Academy*  
703 *of Sciences*, 93(8), 3362–3367. <https://doi.org/10.1073/pnas.93.8.3362>
- 704 Hell, J. W., Westenbroek, R. E., Warner, C., Ahlijanian, M. K., Prystay, W., Gilbert, M. M., ...  
705 Catterall, W. A. (1993). Identification and differential subcellular localization of the neuronal  
706 class C and class D L-type calcium channel alpha 1 subunits. *Journal of Cell Biology*,  
707 123(4), 949–962. <https://doi.org/10.1083/jcb.123.4.949>
- 708 Hu, Z., Tong, X.-J., & Kaplan, J. M. (2013). UNC-13L, UNC-13S, and Tomosyn form a protein  
709 code for fast and slow neurotransmitter release in *Caenorhabditis elegans*. *ELife*, 2,  
710 e00967. <https://doi.org/10.7554/eLife.00967>
- 711 Imig, C., Min, S.-W., Krinner, S., Arancillo, M., Rosenmund, C., Südhof, T. C., ... Cooper, B. H.  
712 (2014). The Morphological and Molecular Nature of Synaptic Vesicle Priming at  
713 Presynaptic Active Zones. *Neuron*, 84(2), 416–431.  
714 <https://doi.org/https://doi.org/10.1016/j.neuron.2014.10.009>
- 715 J.G. White, E. Southgate, J.N. Thomson, & S. Brenner. (1986). The structure of the nervous  
716 system of the nematode *Caenorhabditis elegans*. *Philosophical Transactions of the Royal*  
717 *Society of London. B, Biological Sciences*, 314(1165), 1–340.  
718 <https://doi.org/10.1098/rstb.1986.0056>
- 719 Juette, M. F., Gould, T. J., Lessard, M. D., Mlodzianoski, M. J., Nagpure, B. S., Bennett, B. T.,  
720 ... Bewersdorf, J. (2008). Three-dimensional sub-100 nm resolution fluorescence  
721 microscopy of thick samples. *Nature Methods*, 5(6), 527–529.

- 722 <https://doi.org/10.1038/nmeth.1211>
- 723 Katz, E., Ferro, P. A., Weisz, G., & Uchitel, O. D. (1996). Calcium channels involved in synaptic  
724 transmission at the mature and regenerating mouse neuromuscular junction. *The Journal*  
725 *of Physiology*, 497(3), 687–697. <https://doi.org/10.1113/jphysiol.1996.sp021800>
- 726 Kawabe, H., Mitkovski, M., Kaeser, P. S., Hirrlinger, J., Opazo, F., Nestvogel, D., ... Brose, N.  
727 (2017). ELKS1 localizes the synaptic vesicle priming protein bMunc13-2 to a specific  
728 subset of active zones. *The Journal of Cell Biology*, 216(4), 1143–1161.  
729 <https://doi.org/10.1083/jcb.201606086>
- 730 Krick, N., Ryglewski, S., Pichler, A., Bikbaev, A., Götz, T., Kobler, O., ... Duch, C. (2021).  
731 Separation of presynaptic  $Ca^{2+}$  and  $Ca^{v}2$  channel function in synaptic vesicle exo- and endocytosis by the membrane anchored  
732  $Ca^{2+}$  pump PMCA. *Proceedings of the National Academy of*  
733 *Sciences*, 118(28), e2106621118. <https://doi.org/10.1073/pnas.2106621118>
- 734 Kurshan, P. T., Merrill, S. A., Dong, Y., Ding, C., Hammarlund, M., Bai, J., ... Shen, K. (2018).  
735  $\beta$ -Neurexin and Frizzled Mediate Parallel Synapse Assembly Pathways  
736 Antagonized by Receptor Endocytosis. *Neuron*, 100(1), 150-166.e4.  
737 <https://doi.org/10.1016/j.neuron.2018.09.007>
- 738 Kusick, G. F., Chin, M., Raychaudhuri, S., Lippmann, K., Adula, K. P., Hujber, E. J., ...  
739 Watanabe, S. (2020). Synaptic vesicles transiently dock to refill release sites. *Nature*  
740 *Neuroscience*, 23(11), 1329–1338. <https://doi.org/10.1038/s41593-020-00716-1>
- 741 Kwok, T. C. Y., Ricker, N., Fraser, R., Chan, A. W., Burns, A., Stanley, E. F., ... Roy, P. J.  
742 (2006). A small-molecule screen in *C. elegans* yields a new calcium channel antagonist.  
743 *Nature*, 441(7089), 91–95. <https://doi.org/10.1038/nature04657>
- 744 Lai, Y., Choi, U. B., Leitz, J., Rhee, H. J., Lee, C., Altas, B., ... Brunger, A. T. (2017). Molecular  
745 Mechanisms of Synaptic Vesicle Priming by Munc13 and Munc18. *Neuron*, 95(3), 591-  
746 607.e10. <https://doi.org/https://doi.org/10.1016/j.neuron.2017.07.004>
- 747 Lainé, V., Ségor, J. R., Zhan, H., Bessereau, J.-L., & Jospin, M. (2014). Hyperactivation of L-  
748 type voltage-gated  $Ca^{2+}$  channels in *Caenorhabditis elegans* striated muscle can result  
749 from point mutations in the IS6 or the IIS4 segment of the  $\alpha 1$  subunit. *Journal of*  
750 *Experimental Biology*, 217(21), 3805–3814. <https://doi.org/10.1242/jeb.106732>
- 751 Lee, R. Y., Lobel, L., Hengartner, M., Horvitz, H. R., & Avery, L. (1997). Mutations in the  $\alpha 1$   
752 subunit of an L-type voltage-activated  $Ca^{2+}$  channel cause myotonia in *Caenorhabditis*  
753 *elegans*. *The EMBO Journal*, 16(20), 6066–6076. <https://doi.org/10.1093/emboj/16.20.6066>
- 754 Liu, H., Li, L., Nedelcu, D., Hall, Q., Zhou, L., Wang, W., ... Hu, Z. (2019). Heterodimerization of  
755 UNC-13/RIM regulates synaptic vesicle release probability but not priming in *C. elegans*.  
756 *ELife*, 8, e40585. <https://doi.org/10.7554/eLife.40585>
- 757 Liu, H., Li, L., Wang, W., Gong, J., Yang, X., & Hu, Z. (2018). Spontaneous Vesicle Fusion Is  
758 Differentially Regulated at Cholinergic and GABAergic Synapses. *Cell Reports*, 22(9),  
759 2334–2345. <https://doi.org/https://doi.org/10.1016/j.celrep.2018.02.023>
- 760 Liu, P., Ge, Q., Chen, B., Salkoff, L., Kotlikoff, M. I., & Wang, Z.-W. (2011). Genetic dissection of  
761 ion currents underlying all-or-none action potentials in *C. elegans* body-wall muscle cells.  
762 *The Journal of Physiology*, 589(1), 101–117. <https://doi.org/10.1113/jphysiol.2010.200683>
- 763 Liu, Ping, Chen, B., Mailler, R., & Wang, Z.-W. (2017). Antidromic-rectifying gap junctions  
764 amplify chemical transmission at functionally mixed electrical-chemical synapses. *Nature*  
765 *Communications*, 8(1), 14818. <https://doi.org/10.1038/ncomms14818>
- 766 Liu, Ping, Chen, B., & Wang, Z.-W. (2014). SLO-2 potassium channel is an important regulator  
767 of neurotransmitter release in *Caenorhabditis elegans*. *Nature Communications*, 5(1),  
768 5155. <https://doi.org/10.1038/ncomms6155>
- 769 Liu, Q. (2005). Presynaptic Ryanodine Receptors Are Required for Normal Quantal Size at the  
770 *Caenorhabditis elegans* Neuromuscular Junction. *Journal of Neuroscience*, 25(29), 6745–  
771 6754. <https://doi.org/10.1523/JNEUROSCI.1730-05.2005>
- 772 Liu, Qiang, Chen, B., Yankova, M., Morest, D. K., Maryon, E., Hand, A. R., ... Wang, Z.-W.  
773 (2005). Presynaptic ryanodine receptors are required for normal quantal size at the  
774

- 775 Caenorhabditis elegans neuromuscular junction. *The Journal of Neuroscience : The Official*  
776 *Journal of the Society for Neuroscience*, 25(29), 6745–6754.  
777 <https://doi.org/10.1523/JNEUROSCI.1730-05.2005>
- 778 Liu, Qiang, Hollopeter, G., & Jorgensen, E. M. (2009). Graded synaptic transmission at the  
779 &Caenorhabditis elegans& neuromuscular junction. *Proceedings of the*  
780 *National Academy of Sciences*, 106(26), 10823. <https://doi.org/10.1073/pnas.0903570106>
- 781 Liu, Qiang, Kidd, P. B., Dobosiewicz, M., & Bargmann, C. I. (2018). C. elegans AWA Olfactory  
782 Neurons Fire Calcium-Mediated All-or-None Action Potentials. *Cell*, 175(1), 57-70.e17.  
783 <https://doi.org/https://doi.org/10.1016/j.cell.2018.08.018>
- 784 Lu, J., Machius, M., Dulubova, I., Dai, H., Südhof, T. C., Tomchick, D. R., & Rizo, J. (2006).  
785 Structural Basis for a Munc13–1 Homodimer to Munc13–1/RIM Heterodimer Switch. *PLOS*  
786 *Biology*, 4(7), e192-. Retrieved from <https://doi.org/10.1371/journal.pbio.0040192>
- 787 Maduro, M., & Pilgrim, D. (1995). Identification and cloning of unc-119, a gene expressed in the  
788 Caenorhabditis elegans nervous system. *Genetics*, 141(3), 977–988.  
789 <https://doi.org/10.1093/genetics/141.3.977>
- 790 Marques, F., Thapliyal, S., Javer, A., Shrestha, P., Brown, A. E. X., & Glauser, D. A. (2020).  
791 Tissue-specific isoforms of the single C. elegans Ryanodine receptor gene unc-68 control  
792 specific functions. *PLOS Genetics*, 16(10), e1009102.  
793 <https://doi.org/10.1371/journal.pgen.1009102>
- 794 McRory, J. E., Hamid, J., Doering, C. J., Garcia, E., Parker, R., Hamming, K., ... Snutch, T. P.  
795 (2004). The &CACNA1F& Gene Encodes an L-Type Calcium Channel  
796 with Unique Biophysical Properties and Tissue Distribution. *The Journal of Neuroscience*,  
797 24(7), 1707. <https://doi.org/10.1523/JNEUROSCI.4846-03.2004>
- 798 Mlodzianoski, M. J., Juette, M. F., Beane, G. L., & Bewersdorf, J. (2009). Experimental  
799 characterization of 3D localization techniques for particle-tracking and super-resolution  
800 microscopy. *Opt. Express*, 17(10), 8264–8277. <https://doi.org/10.1364/OE.17.008264>
- 801 Mollwitz, B., Brunk, E., Schmitt, S., Pojer, F., Bannwarth, M., Schiltz, M., ... Johnsson, K.  
802 (2012). Directed Evolution of the Suicide Protein O<sup>6</sup>-Alkylguanine-DNA Alkyltransferase  
803 for Increased Reactivity Results in an Alkylated Protein with Exceptional Stability.  
804 *Biochemistry*, 51(5), 986–994. <https://doi.org/10.1021/bi2016537>
- 805 Nakamura, Y., Harada, H., Kamasawa, N., Matsui, K., Rothman, J. S., Shigemoto, R., ...  
806 Takahashi, T. (2015). Nanoscale Distribution of Presynaptic Ca<sup>2+</sup> Channels and Its Impact  
807 on Vesicular Release during Development. *Neuron*, 85(1), 145–158.  
808 <https://doi.org/https://doi.org/10.1016/j.neuron.2014.11.019>
- 809 Nanou, E., & Catterall, W. A. (2018). Calcium Channels, Synaptic Plasticity, and  
810 Neuropsychiatric Disease. *Neuron*, 98(3), 466–481.  
811 <https://doi.org/https://doi.org/10.1016/j.neuron.2018.03.017>
- 812 Naranjo, D., Wen, H., & Brehm, P. (2015). Zebrafish CaV2.1 Calcium Channels Are Tailored for  
813 Fast Synchronous Neuromuscular Transmission. *Biophysical Journal*, 108(3), 578–584.  
814 <https://doi.org/https://doi.org/10.1016/j.bpj.2014.11.3484>
- 815 Neher, E., & Brose, N. (2018). Dynamically Primed Synaptic Vesicle States: Key to Understand  
816 Synaptic Short-Term Plasticity. *Neuron*, 100(6), 1283–1291.  
817 <https://doi.org/https://doi.org/10.1016/j.neuron.2018.11.024>
- 818 Özçete, Ö. D., & Moser, T. (2021). A sensory cell diversifies its output by varying Ca<sup>2+</sup> influx-  
819 release coupling among active zones. *The EMBO Journal*, 40(5), e106010.  
820 <https://doi.org/https://doi.org/10.15252/embj.2020106010>
- 821 Piggott, C. A., & Jin, Y. (2021). Junctophilins: Key Membrane Tethers in Muscles and Neurons.  
822 *Frontiers in Molecular Neuroscience*, 14, 141. Retrieved from  
823 <https://www.frontiersin.org/article/10.3389/fnmol.2021.709390>
- 824 Platzer, J., Engel, J., Schrott-Fischer, A., Stephan, K., Bova, S., Chen, H., ... Striessnig, J.  
825 (2000). Congenital Deafness and Sinoatrial Node Dysfunction in Mice Lacking Class D L-  
826 Type Ca<sup>2+</sup> Channels. *Cell*, 102(1), 89–97. [https://doi.org/https://doi.org/10.1016/S0092-](https://doi.org/https://doi.org/10.1016/S0092-8674(00)00013-1)  
827 [8674\(00\)00013-1](https://doi.org/https://doi.org/10.1016/S0092-8674(00)00013-1)

- 828 Pokala, N., Liu, Q., Gordus, A., & Bargmann, C. I. (2014). Inducible and titratable silencing of  
829 *Caenorhabditis elegans* neurons in vivo with histamine-gated chloride channels.  
830 *Proceedings of the National Academy of Sciences*, *111*(7), 2770–2775.  
831 <https://doi.org/10.1073/pnas.1400615111>
- 832 Pym, E., Sasidharan, N., Thompson-Peer, K. L., Simon, D. J., Anselmo, A., Sadreyev, R., ...  
833 Kaplan, J. M. (2017). Shank is a dose-dependent regulator of Cav1 calcium current and  
834 CREB target expression. *ELife*, *6*, e18931. <https://doi.org/10.7554/eLife.18931>
- 835 Quade, B., Camacho, M., Zhao, X., Orlando, M., Trimbuch, T., Xu, J., ... Rizo, J. (2019).  
836 Membrane bridging by Munc13-1 is crucial for neurotransmitter release. *ELife*, *8*, e42806.  
837 <https://doi.org/10.7554/eLife.42806>
- 838 Rebola, N., Reva, M., Kirizs, T., Szoboszlay, M., Lőrincz, A., Moneron, G., ... DiGregorio, D. A.  
839 (2019). Distinct Nanoscale Calcium Channel and Synaptic Vesicle Topographies  
840 Contribute to the Diversity of Synaptic Function. *Neuron*, *104*(4), 693-710.e9.  
841 <https://doi.org/https://doi.org/10.1016/j.neuron.2019.08.014>
- 842 Rey, S., Maton, G., Satake, S., Llano, I., Kang, S., Surmeier, D. J., ... Collin, T. (2020).  
843 Physiological involvement of presynaptic L-type voltage-dependent calcium channels in  
844 GABA release of cerebellar molecular layer interneurons. *Journal of Neurochemistry*,  
845 *155*(4), 390–402. <https://doi.org/10.1111/jnc.15100>
- 846 Richmond, J E, Weimer, R. M., & Jorgensen, E. M. (2001). An open form of syntaxin bypasses  
847 the requirement for UNC-13 in vesicle priming. *Nature*, *412*(6844), 338–341.  
848 <https://doi.org/10.1038/35085583>
- 849 Richmond, Janet E, Davis, W. S., & Jorgensen, E. M. (1999). UNC-13 is required for synaptic  
850 vesicle fusion in *C. elegans*. *Nature Neuroscience*, *2*(11), 959–964.  
851 <https://doi.org/10.1038/14755>
- 852 Sahu, G., Wazen, R.-M., Colarusso, P., Chen, S. R. W., Zamponi, G. W., & Turner, R. W.  
853 (2019). Junctophilin Proteins Tether a Cav1-RyR2-KCa3.1 Tripartite Complex to Regulate  
854 Neuronal Excitability. *Cell Reports*, *28*(9), 2427-2442.e6.  
855 <https://doi.org/https://doi.org/10.1016/j.celrep.2019.07.075>
- 856 Schmitz, Y., & Witkovsky, P. (1997). Dependence of photoreceptor glutamate release on a  
857 dihydropyridine-sensitive calcium channel. *Neuroscience*, *78*(4), 1209–1216.  
858 [https://doi.org/https://doi.org/10.1016/S0306-4522\(96\)00678-1](https://doi.org/https://doi.org/10.1016/S0306-4522(96)00678-1)
- 859 Schneggenburger, R., & Neher, E. (2000). Intracellular calcium dependence of transmitter  
860 release rates at a fast central synapse. *Nature*, *406*(6798), 889–893.  
861 <https://doi.org/10.1038/35022702>
- 862 Schneider, M. F. (1994). Control of Calcium Release in Functioning Skeletal Muscle Fibers.  
863 *Annual Review of Physiology*, *56*(1), 463–484.  
864 <https://doi.org/10.1146/annurev.ph.56.030194.002335>
- 865 Schwartz, M. L., & Jorgensen, E. M. (2016). SapTrap, a Toolkit for High-Throughput  
866 CRISPR/Cas9 Gene Modification in *Caenorhabditis elegans*. *Genetics*, *202*(4), 1277–1288.  
867 <https://doi.org/10.1534/genetics.115.184275>
- 868 Siksou, L., Varoqueaux, F., Pascual, O., Triller, A., Brose, N., & Marty, S. (2009). A common  
869 molecular basis for membrane docking and functional priming of synaptic vesicles.  
870 *European Journal of Neuroscience*, *30*(1), 49–56.  
871 <https://doi.org/https://doi.org/10.1111/j.1460-9568.2009.06811.x>
- 872 Südhof, T. C. (2012). The Presynaptic Active Zone. *Neuron*, *75*(1), 11–25.  
873 <https://doi.org/https://doi.org/10.1016/j.neuron.2012.06.012>
- 874 Tong, X.-J., López-Soto, E. J., Li, L., Liu, H., Nedelcu, D., Lipscombe, D., ... Kaplan, J. M.  
875 (2017). Retrograde Synaptic Inhibition Is Mediated by  $\alpha$ -Neurexin Binding to the  $\alpha 2\delta$   
876 Subunits of N-Type Calcium Channels. *Neuron*, *95*(2), 326-340.e5.  
877 <https://doi.org/https://doi.org/10.1016/j.neuron.2017.06.018>
- 878 Topalidou, I., Cattin-Ortolá, J., Pappas, A. L., Cooper, K., Merrihew, G. E., MacCoss, M. J., &  
879 Ailion, M. (2016). The EARP Complex and Its Interactor EIPR-1 Are Required for Cargo  
880 Sorting to Dense-Core Vesicles. *PLOS Genetics*, *12*(5), e1006074.



- 881 <https://doi.org/10.1371/journal.pgen.1006074>
- 882 Tsien, R W, Lipscombe, D., Madison, D. v, Bley, K. R., & Fox, A. P. (1988). Multiple types of  
883 neuronal calcium channels and their selective modulation. *Trends in Neurosciences*,  
884 *11*(10), 431–438. [https://doi.org/https://doi.org/10.1016/0166-2236\(88\)90194-4](https://doi.org/https://doi.org/10.1016/0166-2236(88)90194-4)
- 885 Tsien, Richard W, & Tsien, R. Y. (1990). Calcium channels, stores, and oscillations. *Annual*  
886 *Review of Cell Biology*, *6*(1), 715–760.
- 887 Urbano, F. J., & Uchitel, O. D. (1999). L-Type calcium channels unmasked by cell-permeant Ca  
888  $2+$  buffer at mouse motor nerve terminals. *Pflügers Archiv European Journal of*  
889 *Physiology*, *437*(4), 523–528. <https://doi.org/10.1007/s004240050813>
- 890 Vyleta, N. P., & Jonas, P. (2014). Loose Coupling Between Ca $^{2+}$  Channels and Release  
891 Sensors at a Plastic Hippocampal Synapse. *Science*, *343*(6171), 665–670.  
892 <https://doi.org/10.1126/science.1244811>
- 893 Watanabe, S., Davis, M. W., Kusick, G. F., Iwasa, J., & Jorgensen, E. M. (2020). SynapsEM:  
894 Computer-Assisted Synapse Morphometry. *Frontiers in Synaptic Neuroscience*, *12*.  
895 Retrieved from <https://www.frontiersin.org/article/10.3389/fnsyn.2020.584549>
- 896 Watanabe, S., Liu, Q., Davis, M. W., Hollopeter, G., Thomas, N., Jorgensen, N. B., &  
897 Jorgensen, E. M. (2013). Ultrafast endocytosis at *Caenorhabditis elegans* neuromuscular  
898 junctions. *ELife*, *2*, e00723. <https://doi.org/10.7554/eLife.00723>
- 899 Weber, A. M., Wong, F. K., Tufford, A. R., Schlichter, L. C., Matveev, V., & Stanley, E. F.  
900 (2010). N-type Ca $^{2+}$  channels carry the largest current: implications for nanodomains and  
901 transmitter release. *Nature Neuroscience*, *13*(11), 1348–1350.  
902 <https://doi.org/10.1038/nn.2657>
- 903 Weimer, R. M., Gracheva, E. O., Meyrignac, O., Miller, K. G., Richmond, J. E., & Bessereau, J.-  
904 L. (2006). UNC-13 and UNC-10/Rim Localize Synaptic Vesicles to Specific Membrane  
905 Domains. *The Journal of Neuroscience*, *26*(31), 8040.  
906 <https://doi.org/10.1523/JNEUROSCI.2350-06.2006>
- 907 Yang, X., Wang, S., Sheng, Y., Zhang, M., Zou, W., Wu, L., ... Ma, C. (2015). Syntaxin opening  
908 by the MUN domain underlies the function of Munc13 in synaptic-vesicle priming. *Nature*  
909 *Structural & Molecular Biology*, *22*(7), 547–554. <https://doi.org/10.1038/nsmb.3038>
- 910 Yu, H., Yuan, C., Westenbroek, R. E., & Catterall, W. A. (2018). The AKAP Cypher/Zasp  
911 contributes to  $\beta$ -adrenergic/PKA stimulation of cardiac CaV1.2 calcium channels. *Journal*  
912 *of General Physiology*, *150*(6), 883–889. <https://doi.org/10.1085/jgp.201711818>
- 913 Zhang, S. Y., Robertson, D., Yates, G., & Everett, A. (1999). Role of L-Type Ca $^{2+}$  Channels in  
914 Transmitter Release From Mammalian Inner Hair Cells I. Gross Sound-Evoked Potentials.  
915 *Journal of Neurophysiology*, *82*(6), 3307–3315. <https://doi.org/10.1152/jn.1999.82.6.3307>
- 916 Zhang, X., Chen, X., Zeng, Z., Zhang, M., Sun, Y., Xi, P., ... Xu, P. (2015). Development of a  
917 reversibly switchable fluorescent protein for super-resolution optical fluctuation imaging  
918 (SOFI). *ACS Nano*, *9*(3), 2659–2667. <https://doi.org/10.1021/nn5064387>
- 919 Zhou, K., Stawicki, T. M., Goncharov, A., & Jin, Y. (2013). Position of UNC-13 in the active zone  
920 regulates synaptic vesicle release probability and release kinetics. *ELife*, *2*, e01180.  
921 <https://doi.org/10.7554/eLife.01180>
- 922

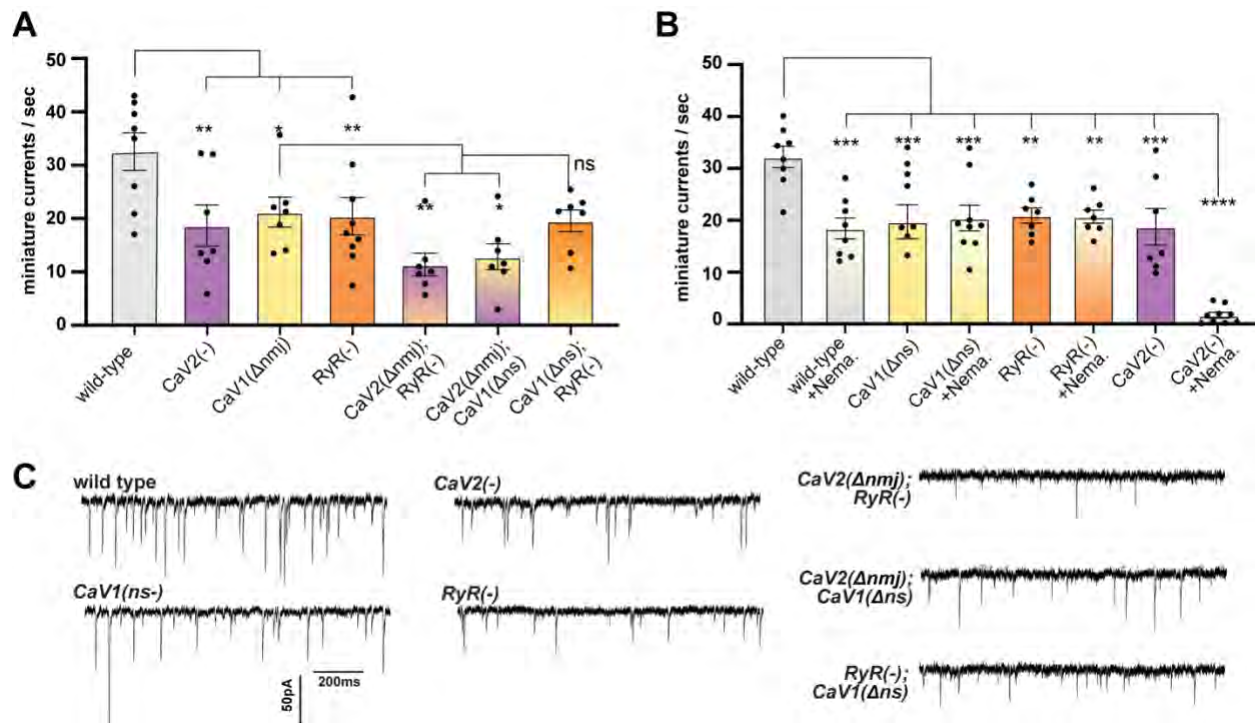

**Figure 1. CaV2 and CaV1-RyR release acetylcholine vesicles at the *C. elegans* neuromuscular junction.**

(a) CaV2 and CaV1-RyR additive contributions to spontaneous release. At 0.5mM calcium, N2 wild-type  $33 \pm 4$  minis/s  $n=8$ , and single mutants *unc-2(lj1)*  $19 \pm 4$  minis/s  $n=7$  (\* $p<0.05$  versus N2), *egl-19(st556);oxTi1047* (EG9034) are CaV1 null animals with a single copy transgene insertion rescuing *egl-19* in muscle, but not in neurons, will be referred to as CaV1(Δns) for brevity,  $21 \pm 3$  minis/s  $n=7$ , *unc-68(e540)* (CB540)  $20 \pm 4$  minis/s  $n=9$ . CaV2(Δcord) double mutants: *unc-2(lj1);unc-68(e540);oxEx2097* (EG9405)  $11 \pm 2$  minis/s  $n=7$ , *unc-2(lj1);egl-19(st556);oxTi1047; oxEx2097* (EG9406)  $13 \pm 2$  minis/s  $n=7$ , and viable double mutant *egl-19(st556);oxTi1047;unc-68(e540)* (EG8827)  $20 \pm 2$  minis/s  $n=7$ .

(b) Spontaneous neurotransmission by CaV1 and RyR are inhibited by nepadipine. At 0.5mM calcium, N2 wild-type  $32 \pm 2$  minis/s  $n=8$ , with nepadipine  $18 \pm 2$  mini/s  $n=8$ . *egl-19(st556);oxTi1047* (EG9034)  $20 \pm 3$  minis/s  $n=10$ , with nepadipine  $20 \pm 2$  mini/s  $n=9$ . *unc-68(e540)* (CB540)  $21 \pm 1$  minis/s  $n=7$ , with nepadipine  $21 \pm 1$  mini/s  $n=7$ . Single mutants *unc-2(lj1)*  $19 \pm 4$  minis/s  $n=7$ , with nepadipine  $2 \pm 1$  mini/s  $n=9$ .

(c) Sample traces of spontaneous release in 0.5mM extracellular calcium. Error reported in SEM. \* $p<0.05$  \*\* $p<0.005$  by Welch's t-test.

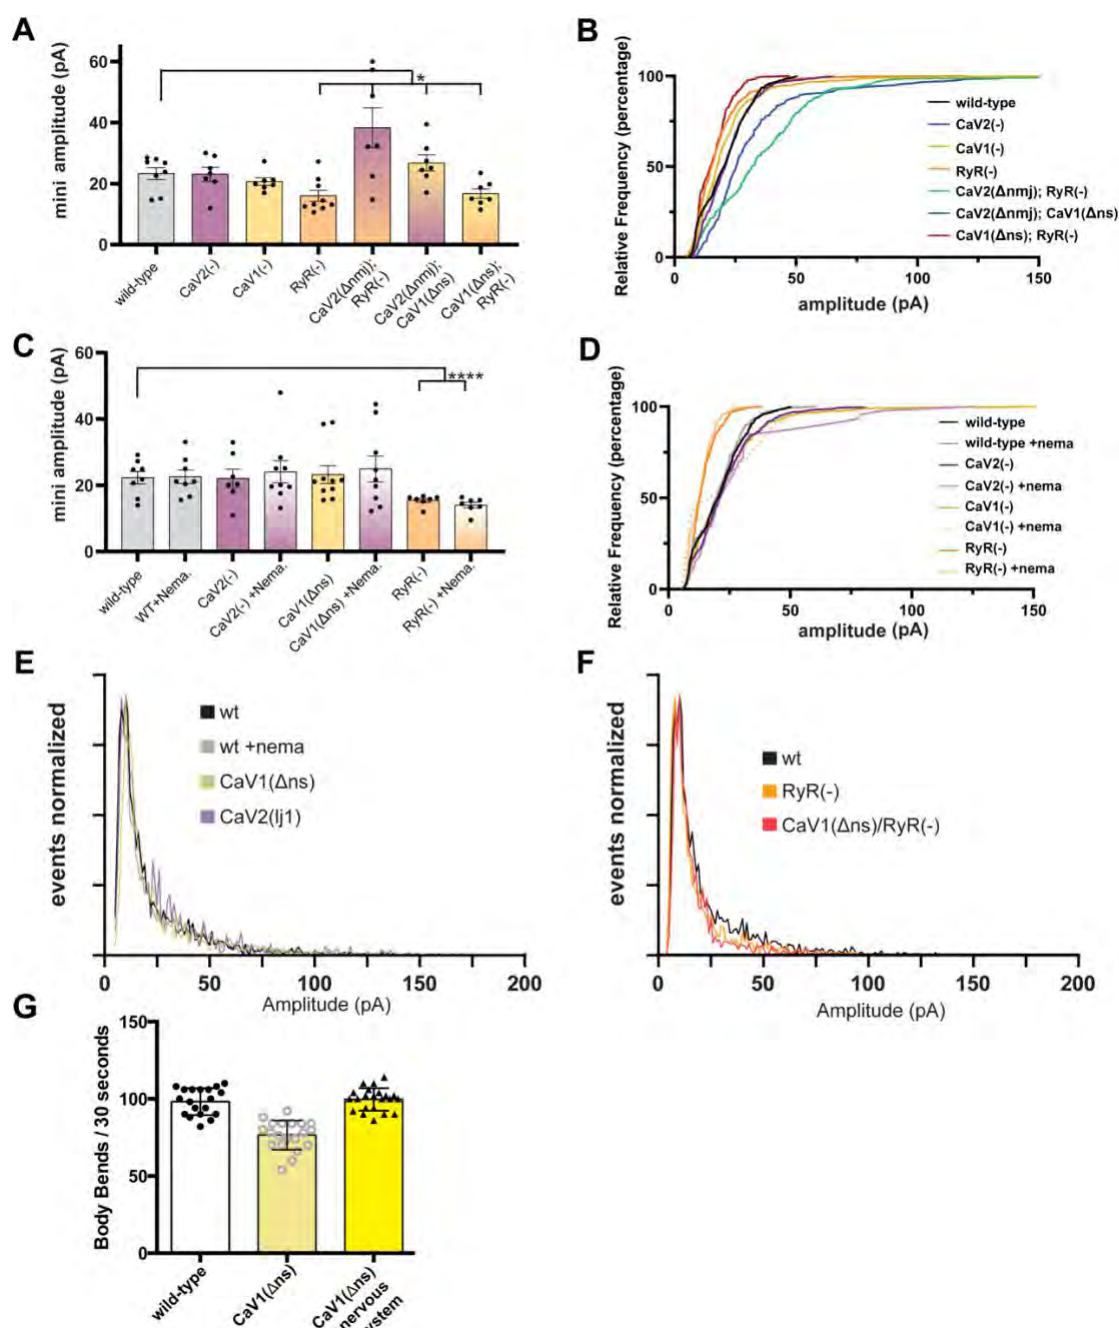

**Extended Data Figure 1. Calcium channel miniature amplitudes.**

(a) RyR is required for large-amplitude spontaneous events. At 0.5mM calcium, N2 wild-type  $23 \pm 2$  pA  $n=8$ , and single mutants *unc-2(lj1)*  $23 \pm 2$  pA  $n=7$ , *egl-19(st556);oxTi1047* (EG9034)  $21 \pm 1$  pA  $n=7$ , *unc-68(e540)* (CB540)  $16 \pm 2$  pA  $n=9$ . CaV2(Δcord) double mutants *unc-2(lj1);unc-68(e540);oxEx2097* (EG9405)  $38 \pm 3$  pA  $n=7$ , *unc-2(lj1);egl-19(st556);oxTi1047;oxEx2097* (EG9406)  $26 \pm 3$  pA  $n=7$ , and viable double mutant *egl-19(st556);oxTi1047;unc-68(e540)* (EG8827)  $17 \pm 2$  pA  $n=7$ . (b) Cumulative distribution plot of mutant amplitudes

(c) Nemadipine does not inhibit large-amplitude spontaneous events. At 0.5mM calcium, N2 wild-type  $22 \pm 2$  pA  $n=8$ , with nemadipine  $23 \pm 2$  pA  $n=8$ . Single mutants *unc-2(lj1)*  $22 \pm 3$  pA  $n=7$ , with nemadipine  $24 \pm 3$  pA  $n=9$ . *egl-19(st556);oxTi1047* (EG9034)  $23 \pm 3$  pA  $n=10$ , with nemadipine  $25 \pm 4$  pA  $n=9$ . *unc-68(e540)* (CB540)  $15 \pm 1$  pA  $n=7$ , with nemadipine  $14 \pm 1$  pA  $n=7$ .

(d) Cumulative distribution plot of nemadipine treatment amplitudes.

(e) Frequency distribution plot of calcium mutant amplitudes normalized to the mode.

(f) Frequency distribution plot of ryanodine mutants with reduced amplitudes, normalized to mode.

22  
23  
24  
25  
26  
27  
28  
29  
30  
31  
32  
33  
34  
35  
36

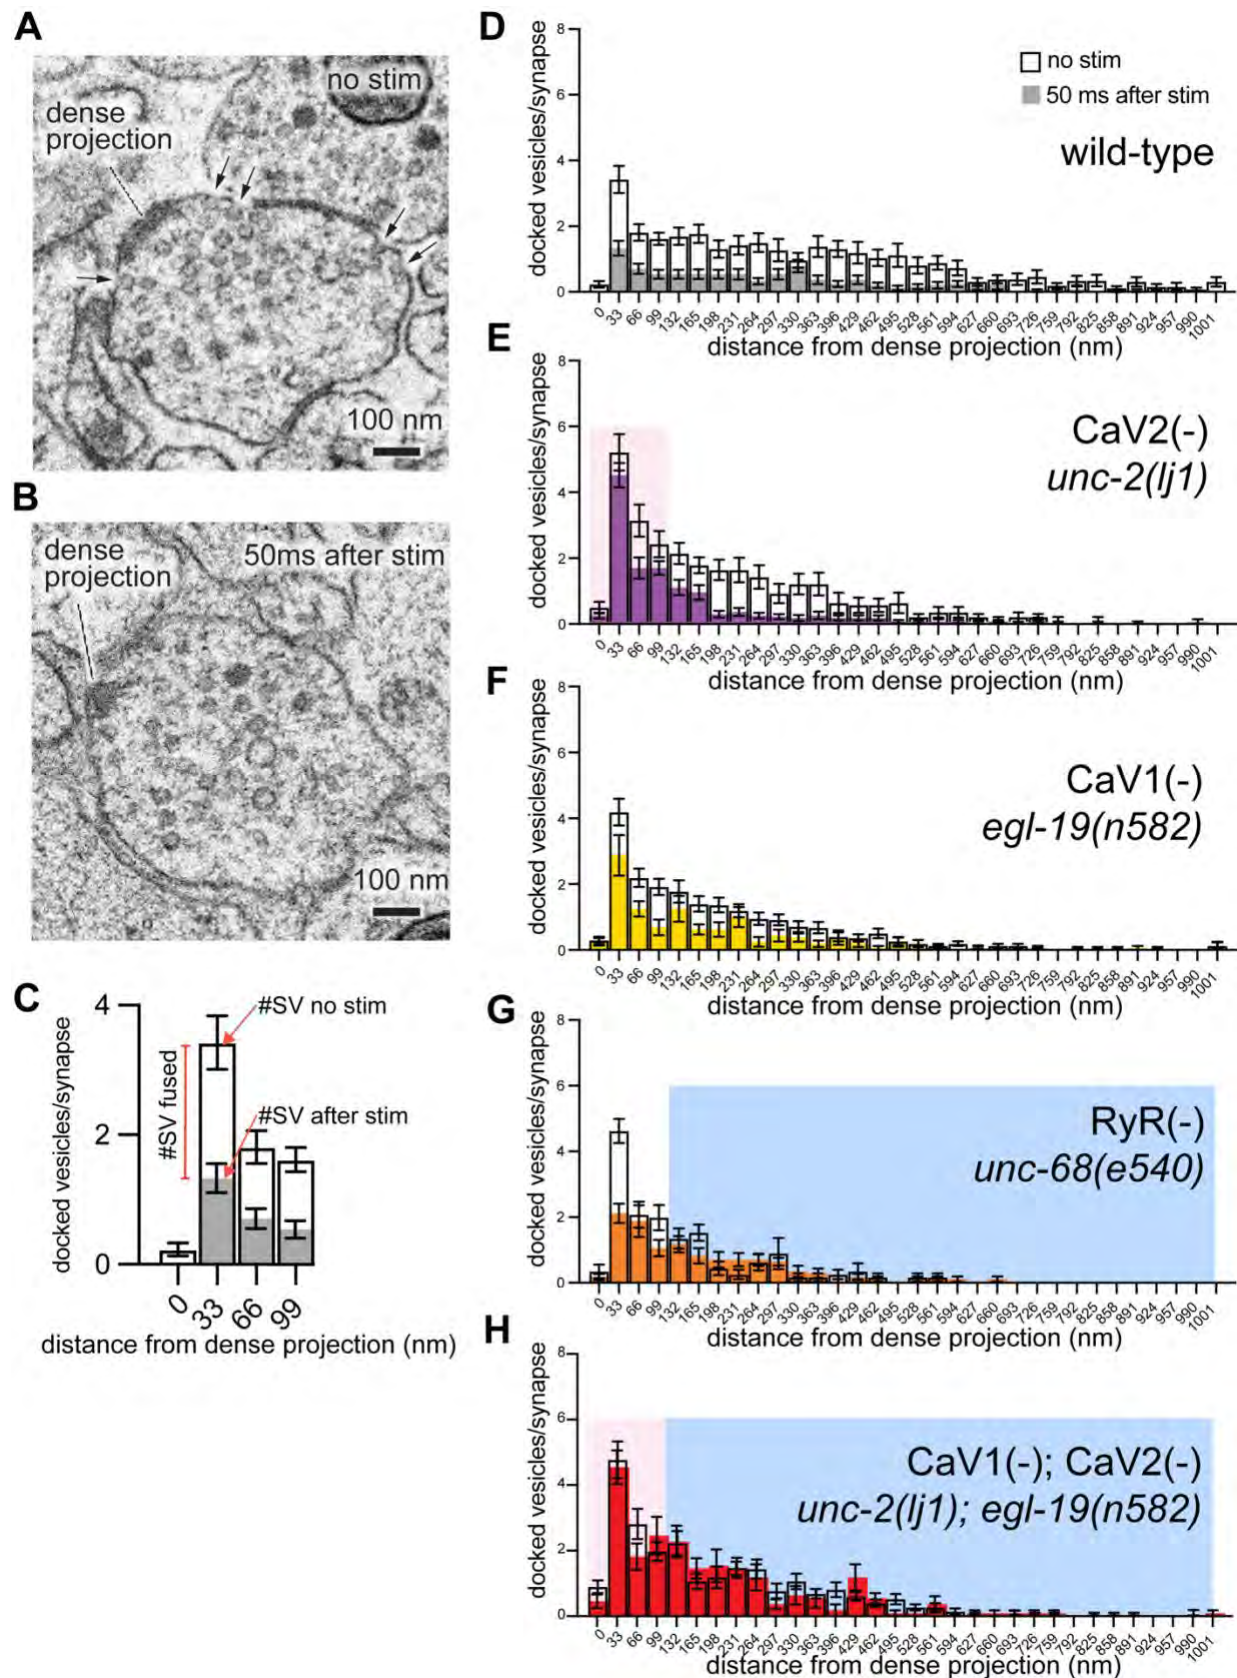

37  
38  
39  
40

**Figure 2. CaV2 and CaV1-RyR act at distinct vesicle release sites.**

(a-b) Docked vesicles (black arrows) are present near dense projections in electron micrograph of unstimulated animals, but not 50ms after stimulation by channelrhodopsin.

41 (c) cartoon diagram of interpretation of fusion histograms. The number of synaptic vesicles fused by  
42 stimulation can be determined by comparing the number of synaptic vesicles docked at the active  
43 zone at a given distance range before and after stimulation.  
44 (d-h) Average number of docked vesicles per synapse in animals with and without stimulation by  
45 channelrhodopsin.  
46 (d) Wild-type animals contain fewer docked vesicles at all locations after stimulation.  
47 (g) CaV2 mutant *unc-2(lj1)* retains docked vesicles within 100nm of dense projections after  
48 stimulation.  
49 (f) CaV1 mutant *egl-19(n582)* has vesicle fusion defects at all distances.  
50 (g) Docked vesicles within 100nm of dense projections are reduced in RyR mutant *unc-68(e540)*  
51 while retaining lateral vesicles.  
52 (h) Double mutant disrupting CaV1 *egl-19(n582)* and CaV2 *unc-2(lj1)* exhibit no change in docked  
53 vesicles after stimulation N=2 animals. N2(nostim), n=26 synapses. N2(stim) n = 24 synapses.  
54 CaV2(nostim) n=14. CaV2(stim) n=27 synapses. CaV1(nostim) n=29 synapses. CaV1(stim) n=16  
55 synapses. RyR(nostim) n=11 synapses. RyR(stim) n=17 synapses. CaV2;CaV1(nostim) n=24  
56 synapses. CaV2;CaV1(stim) n=17 synapses. Errors given in SEM.  
57

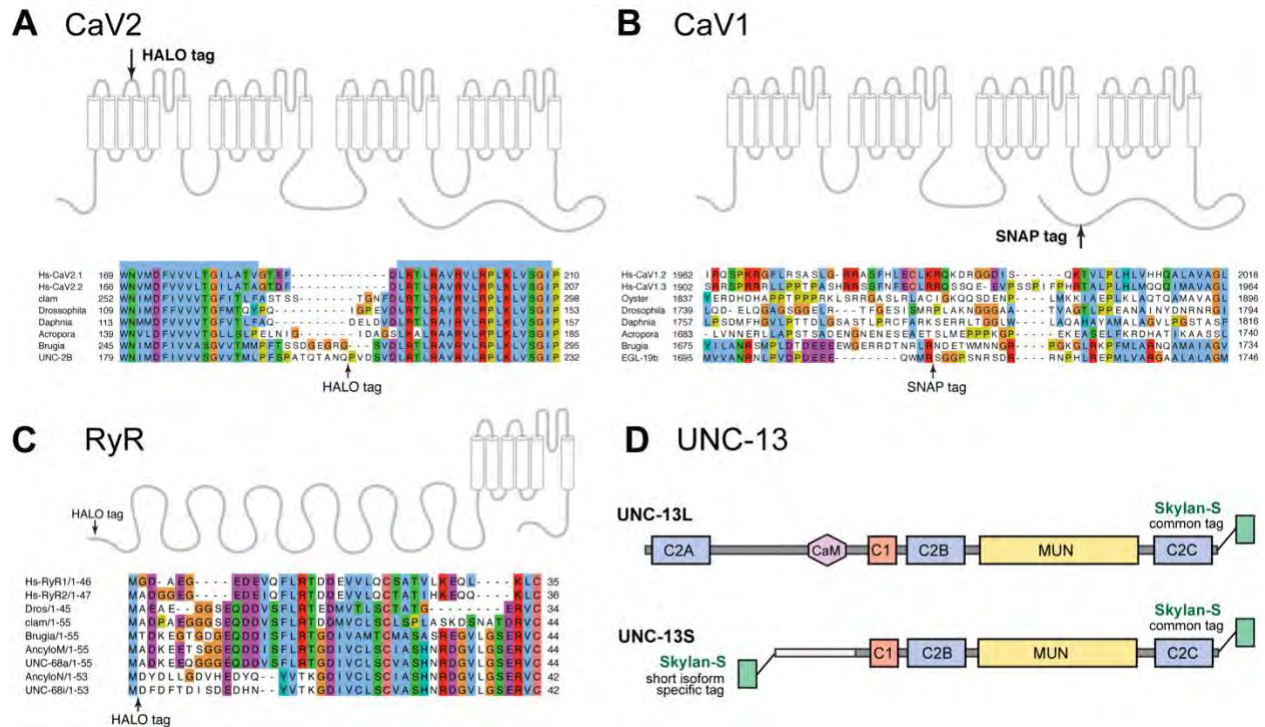

58  
59  
60  
61  
62  
63  
64  
65  
66  
67

**Extended Data Figure 2. Calcium channel and UNC-13 tagging strategy.**

(a-c), Tagging strategies and sites used for CRISPR/Cas9 tagging of the endogenous loci of CaV2, CaV1, and RyR.

(d) tagging strategy at the endogenous locus of *unc-13* CRISPR/Cas9. C-terminal tag labels all isoforms of UNC-13. N-termini are unique to the long and short isoform, thus short can be exclusively tagged.

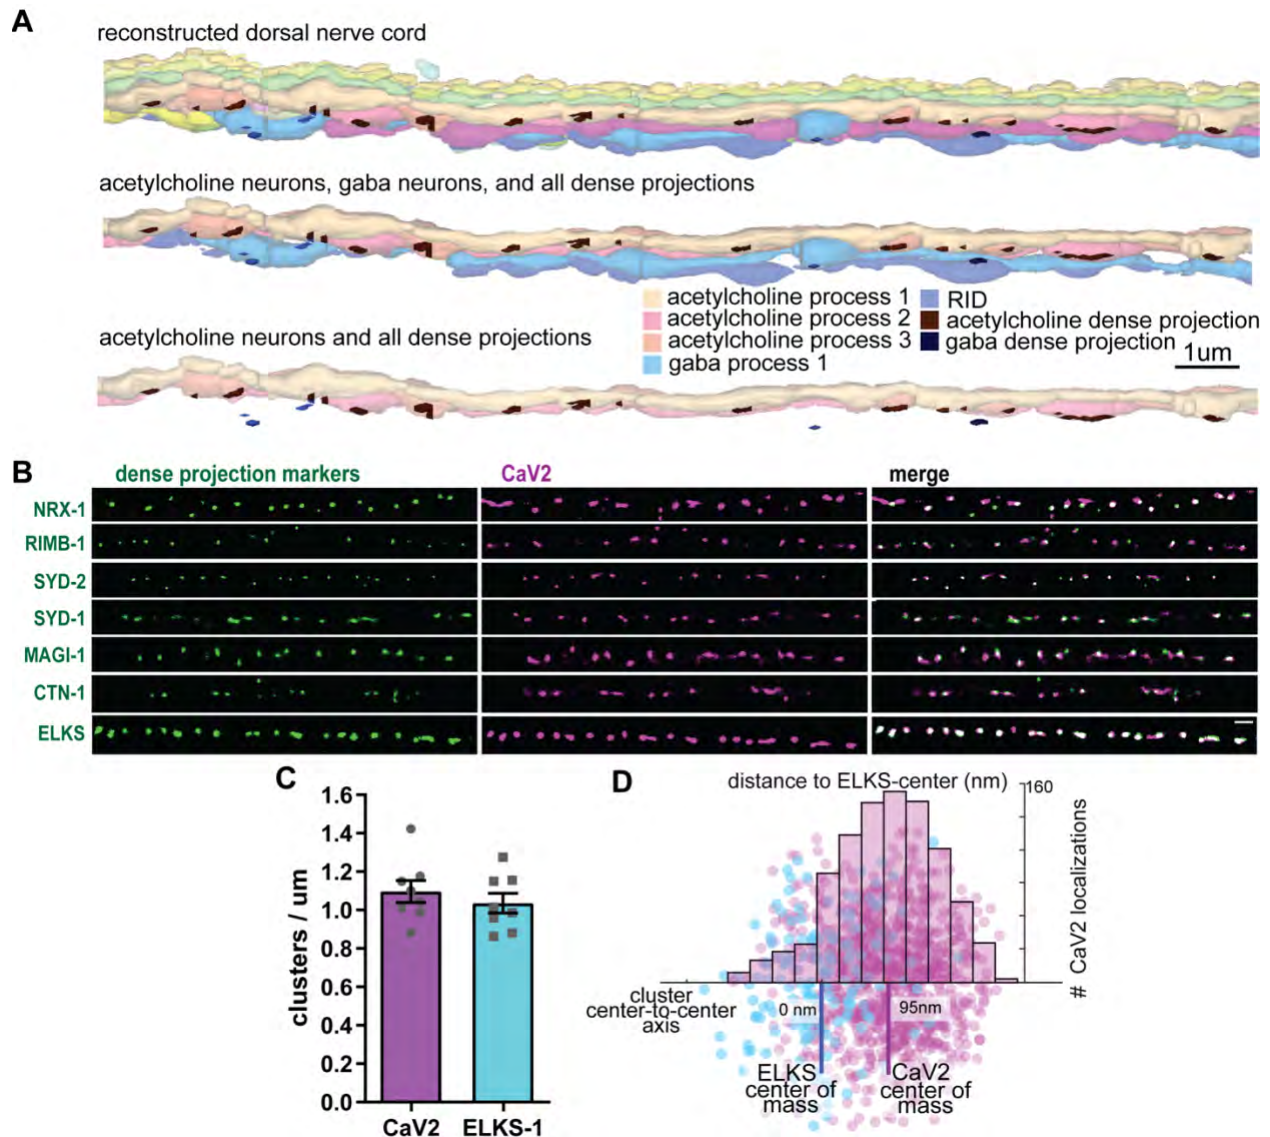

68  
69  
70  
71  
72  
73  
74  
75  
76  
77  
78  
79

**Figure 3. Dorsal nerve cord reconstruction and candidate dense projection markers.**

(a) 20-micron reconstruction of N2 *C. elegans* dorsal nerve cord from 100nm sections. Image was oriented to reproduce the positioning used for all SML microscopy in this study. Scale bar 1µm.

(b) CaV2 colocalizes with a number of cytomatrix active zone proteins. Super-resolution images of various SkyJan-S tagged cytomatrix active zone proteins versus CaV2::HALO.

(c) Clusters of ELKS and CaV2 per micron of dorsal nerve cord from super-resolution image analysis.

(d) Localization plot tool (Proberuler) example diagram of a single ELKS(cyan) and CaV2(magenta) synapse. Cluster centers are marked by solid lines.

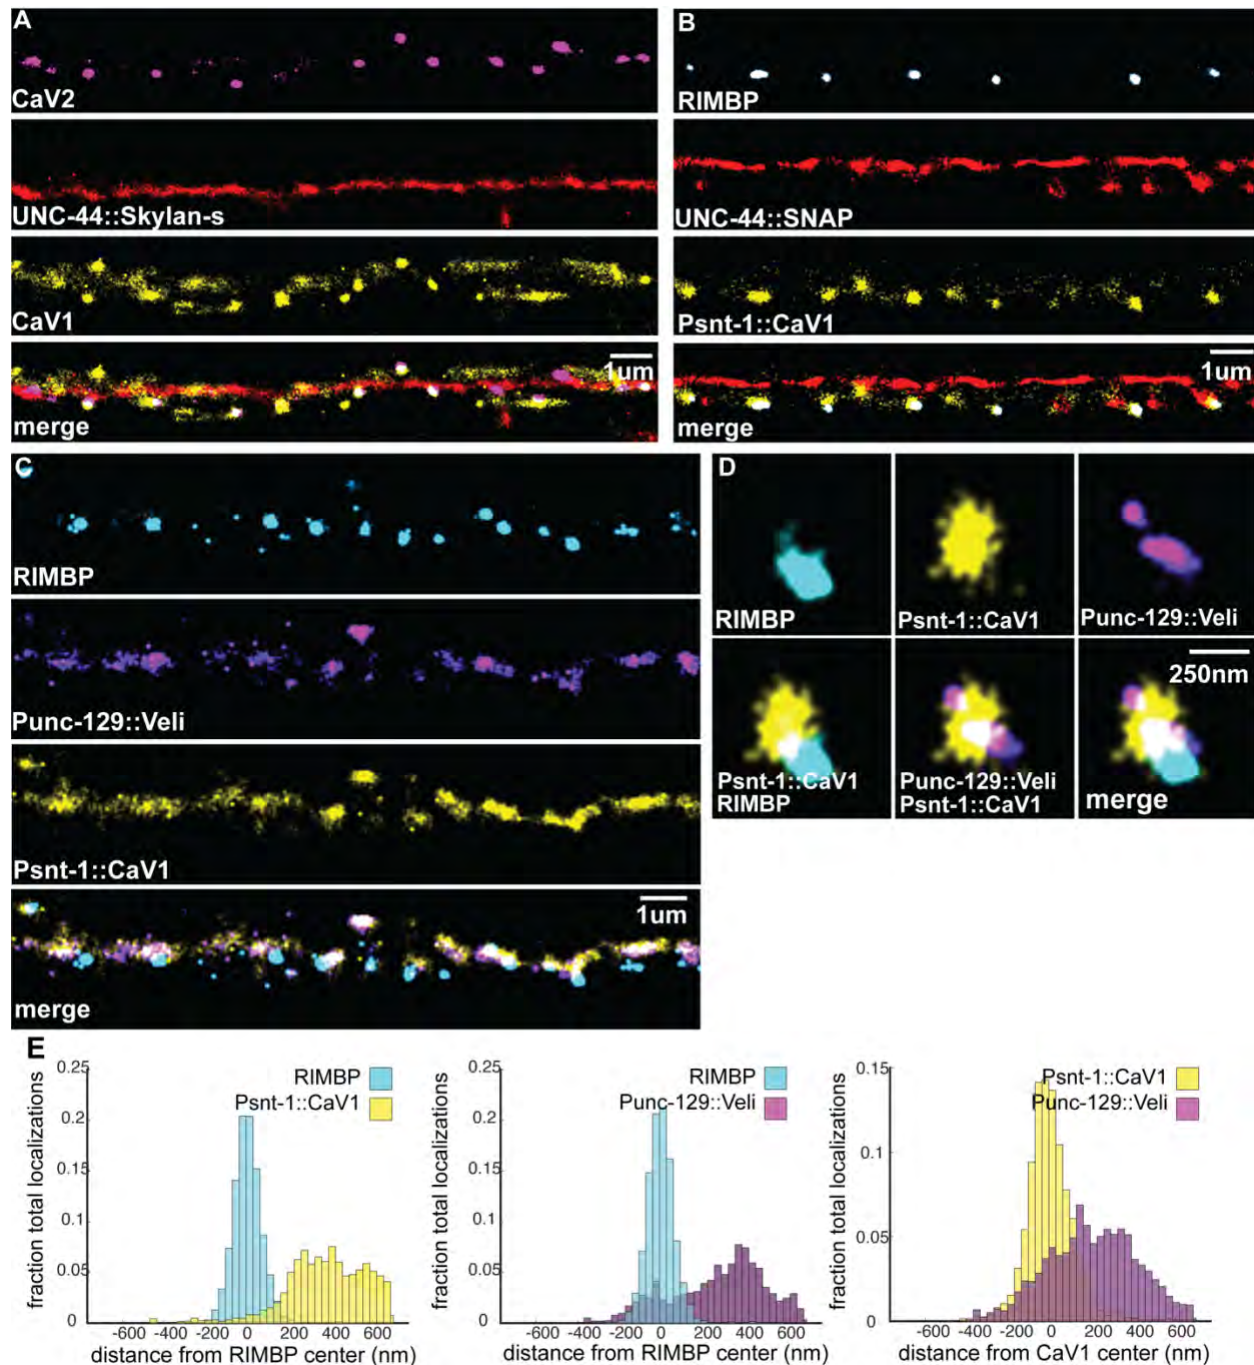

80  
81

**Extended Data Figure 3. Neuronal CaV1 forms clusters at presynaptic boutons.**

Comparison of endogenously tagged CaV1 and exogenously rescued Psnt-1::CaV1.

(a) endogenous CaV1. Localization microscopy images of dorsal nerve cord with CaV2/*unc-2*[(*ox672*)*HALO*]::HTL-JF646 (purple), and CaV1/*egl-19*[(*ox728*)*SNAP*]::STL-JF549cp (yellow) and Ankyrin/*unc-44*[(*ox802*)*SKY-S*] (red). scale bar = 1 $\mu$ m.

(b) Exogenous CaV1. Localization microscopy images of dorsal nerve cord. In the *egl-19*(*st556*) background, CaV1 was rescued in muscle using a single copy transgene insertion of (*oxTi1047*)[*Pset-18*::*egl-19b*]. CaV1 was rescued in neurons using a single copy transgene insertion of (*oxTi1055*)[*Psnt-1*::*HALO*::*egl-19b*]. Labelled with *Psnt-1*::CaV1/*egl-19*(*oxTi1055*)[*Psnt-1*::*HALO*::*egl-19b*]::HTL-JF646 (purple), *unc-44*::TMRStar (red) and RIMBP/*rimb-1*[(*ox704*)*SKY-S*] (cyan). scale bar = 1 $\mu$ m.

(c) Neuronal CaV1 partially colocalizes with acetylcholine neuron driven Veli/LIN-7. Localization



94 microscopy images of dorsal nerve cord. Dense projections are marked by RIMBP/*rimb-*  
95 *1(ox704[SKY-S])*. In the *egl-19(st556)* background, CaV1 was rescued in muscle using a single copy  
96 transgene insertion of (*oxTi1047[Pset-18::egl-19b]*). CaV1 was rescued in neurons using a single  
97 copy transgene insertion of (*oxTi1055[Psnt-1::HALO::egl-19b]*). *Veli/lin-7(oxEx2223[Punc-129::lin-*  
98 *7::SNAP])* was expressed using the *unc-129* promotor as an extrachromosomal array. scale bar =  
99 1um.  
100 (d) Single synapse analysis of animals stained with HTL-JF646 (magenta) and STL-JF549cp  
101 (yellow). dense projections are marked by RIMBP/*rimb-1(ox704[SKY-S])* tagged with SKYLAN-S. In  
102 the *egl-19(st556)* background, CaV1 was rescued in muscle using a single copy transgene insertion  
103 of (*oxTi1047[Pset-18::egl-19b]*). CaV1 was rescued in neurons using a single copy transgene  
104 insertion of (*oxTi1055[Psnt-1::HALO::egl-19b]*). *Veli/LIN-7(oxEx2223[Punc-129::lin-7::SNAP])* was  
105 overexpressed using the *unc-129* promotor as an extrachromosomal array. Scale bar = 250nm.  
106 (e-g) Cumulative distribution plot of *Psnt-1::CaV1(oxTi1055[Psnt-1::HALO::egl-19b])* to RIMBP/*rimb-*  
107 *1(ox704[SKY-S])* center and *Veli/lin-7(oxEx2223[Punc-129::lin-7::SNAP])* to RIMBP/*rimb-*  
108 *1(ox704[SKY-S])* center measured from single synapses. n=24 synapses, N=5 animals  
109

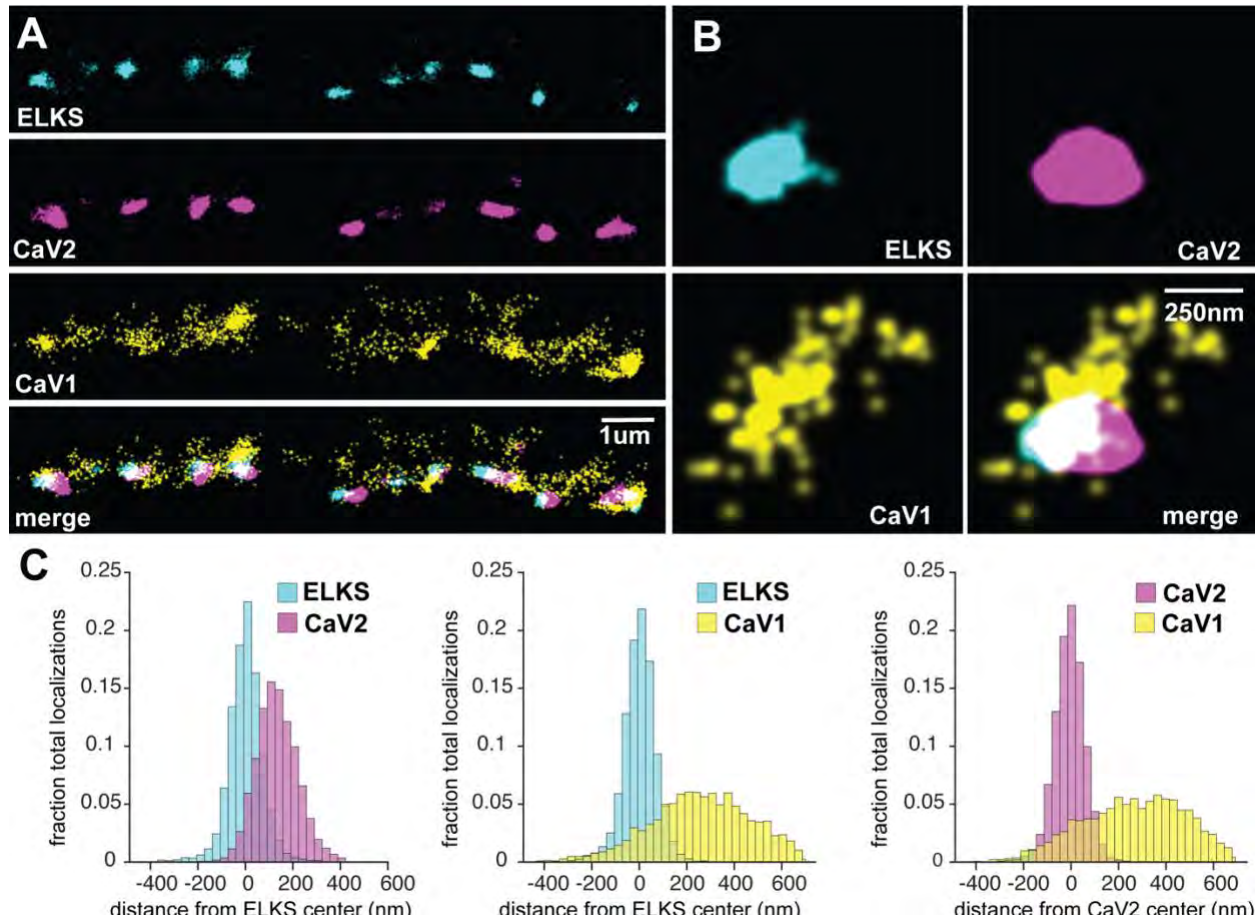

**Figure 4. CaV2, CaV1, and ELKS localizations.**

ELKS and CaV2 colocalize, CaV1 is diffuse and lateral to CaV2.

(a) Localization microscopy images of animals stained with HTL-JF646 (magenta) and STL-JF549pa (yellow). Dorsal cord images: active zones labeled by ELKS/*elks-1(ox747[SKY-S])* colocalize with CaV2/*unc-2(ox672[HALO])* but not CaV1/*egl-19(ox728[SNAP])*. Scale bar = 1um.

(b) Single synapse region of interests: active zones labeled by ELKS/*elks-1(ox747[SKY-S])* colocalize with CaV2/*unc-2(ox672[HALO])* but not CaV1/*egl-19(ox728[SNAP])*. Scale bar = 250nm

(c) Cumulative frequency distribution plot of distances from CaV2 localization to ELKS/*elks-1(ox747[SKY-S])* cluster center measured from single synapses. Cumulative frequency distribution plot of distances from CaV1/*egl-19(ox728[SNAP])* localization to ELKS/*elks-1(ox747[SKY-S])* cluster center measured from individual synapses.

Cumulative frequency distribution plot of distances from CaV1/*egl-19(ox728[SNAP])* localizations to CaV2/*unc-2(ox672[HALO])* cluster center measured from individual synapses. n=26 synapses, N=5 animals

1  
2  
3  
4  
5  
6  
7  
8  
9  
10  
11  
12  
13  
14  
15  
16

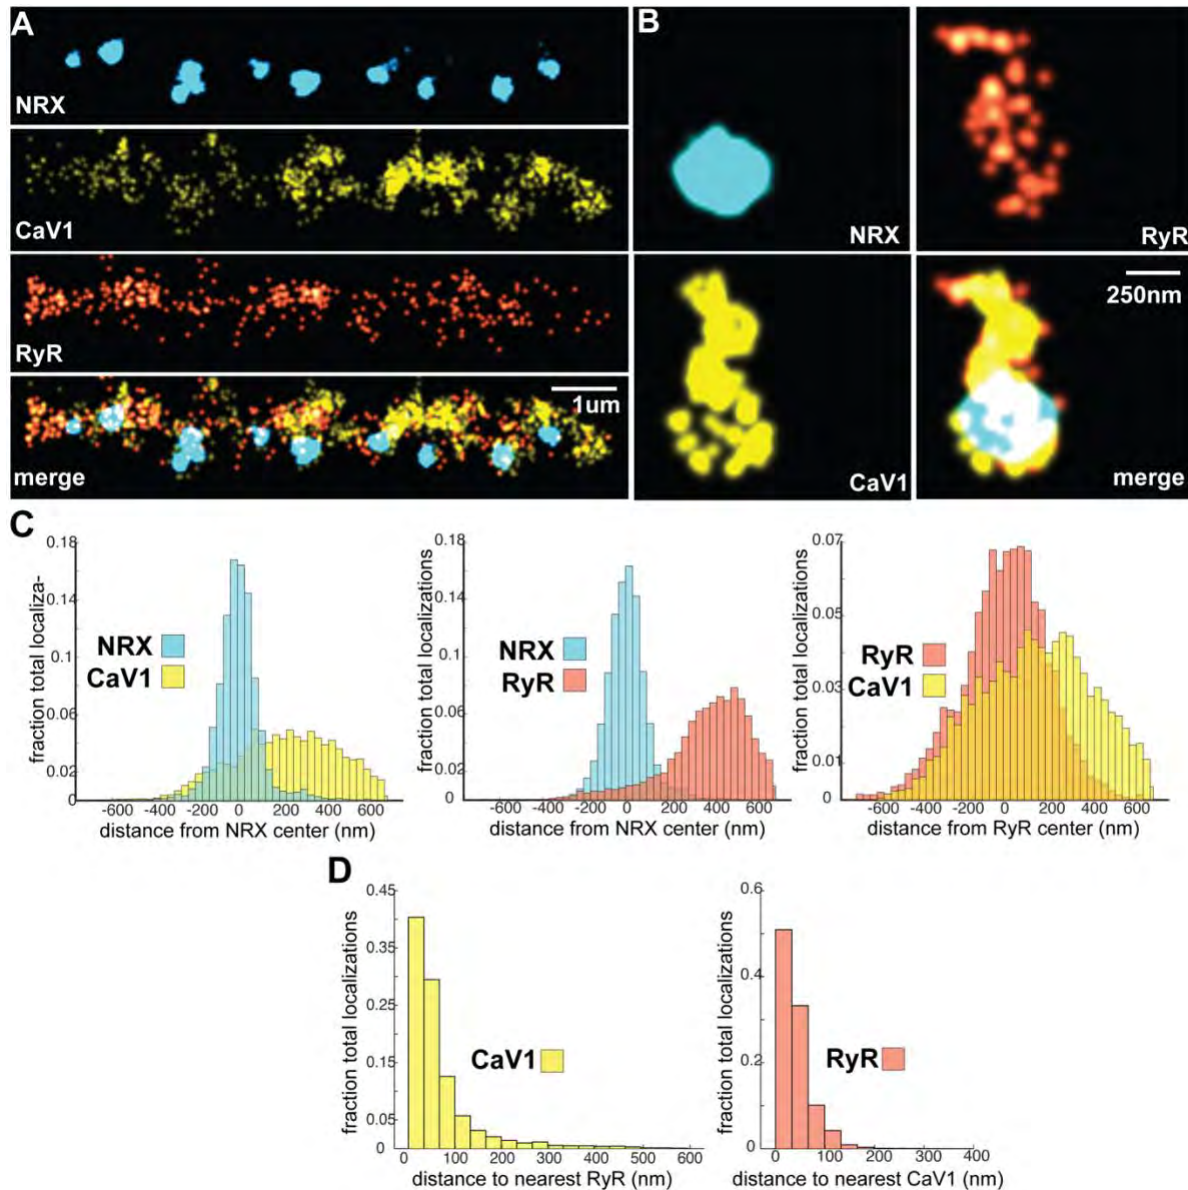

17

18 **Figure 5. CaV1/RyR colocalize to form a lateral calcium source.**

19 (a) CaV1 and RyR colocalize throughout the dorsal cord. Dorsal cord images: active zones labeled  
20 by Neurexin/*nrx-1(ox719[SKY-S])* does not colocalize with CaV1/*egl-19(ox728[SNAP])* and  
21 RyR/*unc-68(ox721[HALO])*. Scale bar = 1μm

22 (b) RyR and CaV1 colocalize within synapses. Single synapse region of interests: active zones  
23 labeled by Neurexin/*nrx-1(ox719[SKY-S])* does not colocalize with CaV1/*egl-19(ox728[SNAP])* and  
24 RyR/*unc-68(ox721[HALO])*. Scale bar = 250nm.

25 (c) Cumulative frequency distribution plot of distances from CaV1/*egl-19(ox728[SNAP])* localization  
26 to Neurexin/*nrx-1(ox719[SKY-S])* cluster center measured from single synapses. Cumulative  
27 frequency distribution plot of distances from RyR/*unc-68(ox721[HALO])* localization to Neurexin/*nrx-*  
28 *1(ox719[SKY-S])* cluster center measured from single synapses. Cumulative frequency distribution  
29 plot of distances from CaV1/*egl-19(ox728[SNAP])* localization to RyR/*unc-68(ox721[HALO])*  
30 measured from single synapses.

31 (d) RyR/*unc-68(ox721[HALO])* and CaV1/*egl-19(ox728[SNAP])* are coincident. Nearest neighbor  
32 analysis was performed on CaV1 localizations to find the nearest RyR localization. Nearest neighbor  
33 analysis was performed on RyR/*unc-68(ox721[HALO])* localizations to find the nearest CaV1/*egl-*  
34 *19(ox728[SNAP])* localization. n=5 animals, 25 synapses

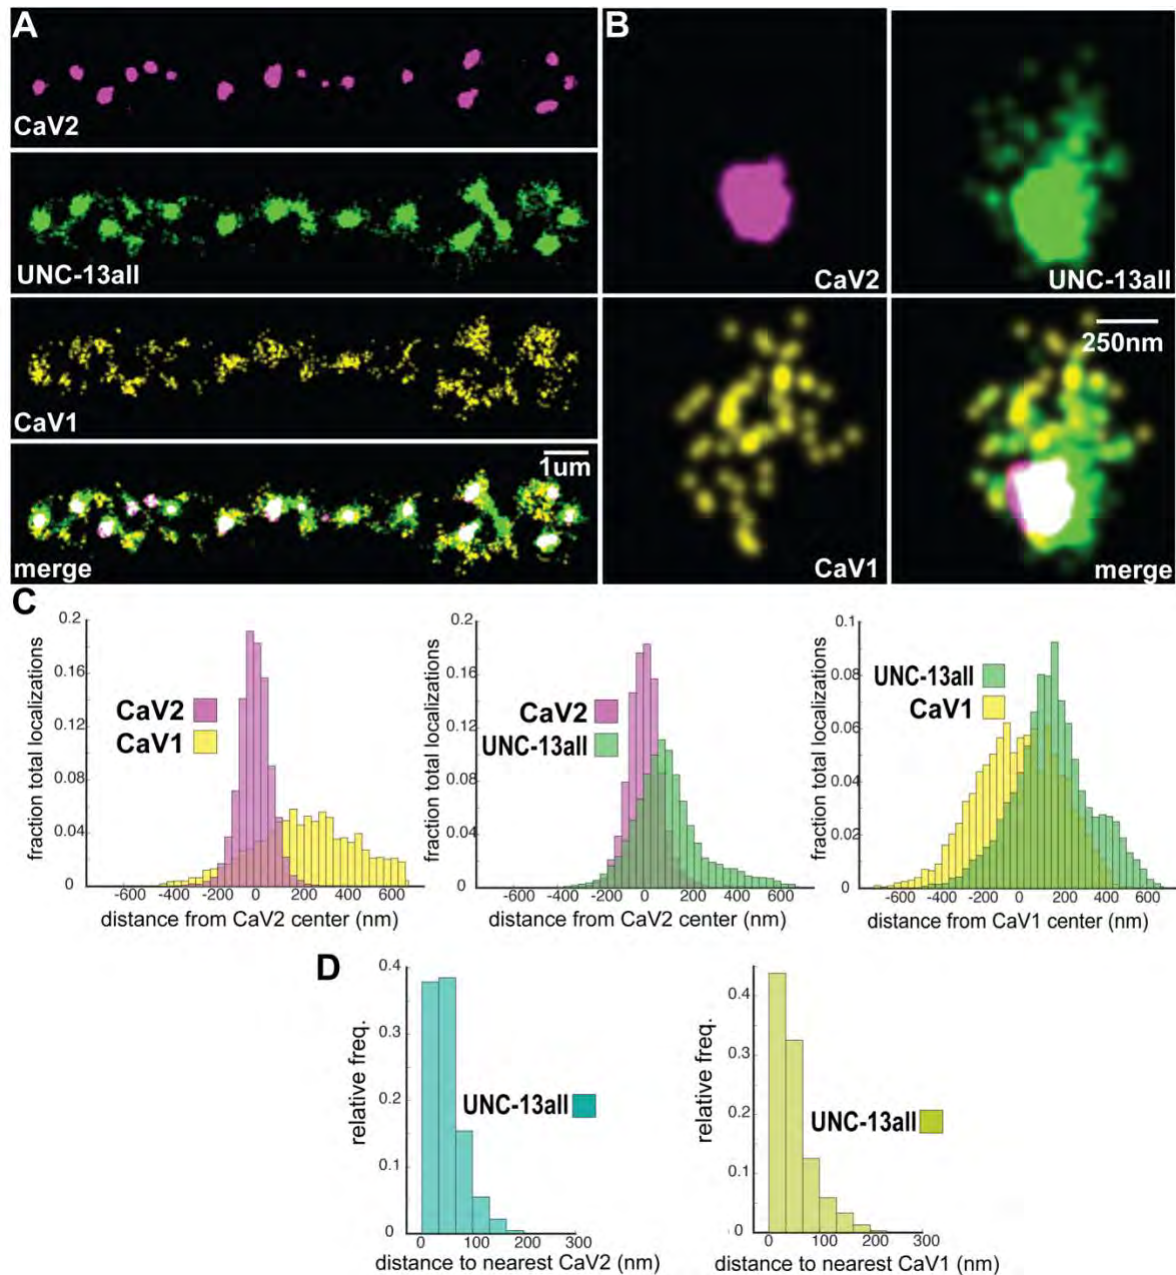

35  
36  
37  
38  
39  
40  
41  
42  
43  
44  
45  
46  
47  
48  
49  
50  
51

**Figure 6. UNC-13all localizes with CaV2 and CaV1 calcium channels.**

Localization microscopy identifies CaV1 and CaV2 associated with *unc-13(ox748[SKY-S])* which labels a c-terminal site common to all isoforms.

(A) UNC-13all colocalizes with both CaV1 and CaV2 throughout the dorsal cord. Localization microscopy images of dorsal nerve cord labelled with CaV2/*unc-2(ox672[HALO])*, CaV1/*egl-19(ox728[SNAP])*, and *unc-13(ox748[SKY-S])*. Animals stained with HTL-JF646 and STL-JF549.

(B) UNC-13all colocalizes with both CaV1 and CaV2 within single synapses. Single synapse region of interests labelled with CaV2/*unc-2(ox672[HALO])*, CaV1/*egl-19(ox728[SNAP])* and *unc-13(ox748[SKY-S])*.

(C) Cumulative frequency distribution plot of distances from CaV1/*egl-19(ox728[SNAP])* localization to CaV2/*unc-2(ox672[HALO])* cluster center. Distance from *unc-13(ox748[SKY-S])* localizations to CaV2/*unc-2(ox672[HALO])* cluster center measured from single synapses.

(D) Nearest-neighbor distances between CaV1/*egl-19(ox728[SNAP])* and *unc-13(ox748[SKY-S])* localizations. Nearest neighbor analysis between *unc-13(ox748[SKY-S])* and CaV2/*unc-2(ox672[HALO])* or CaV1/*egl-19(ox728[SNAP])*.

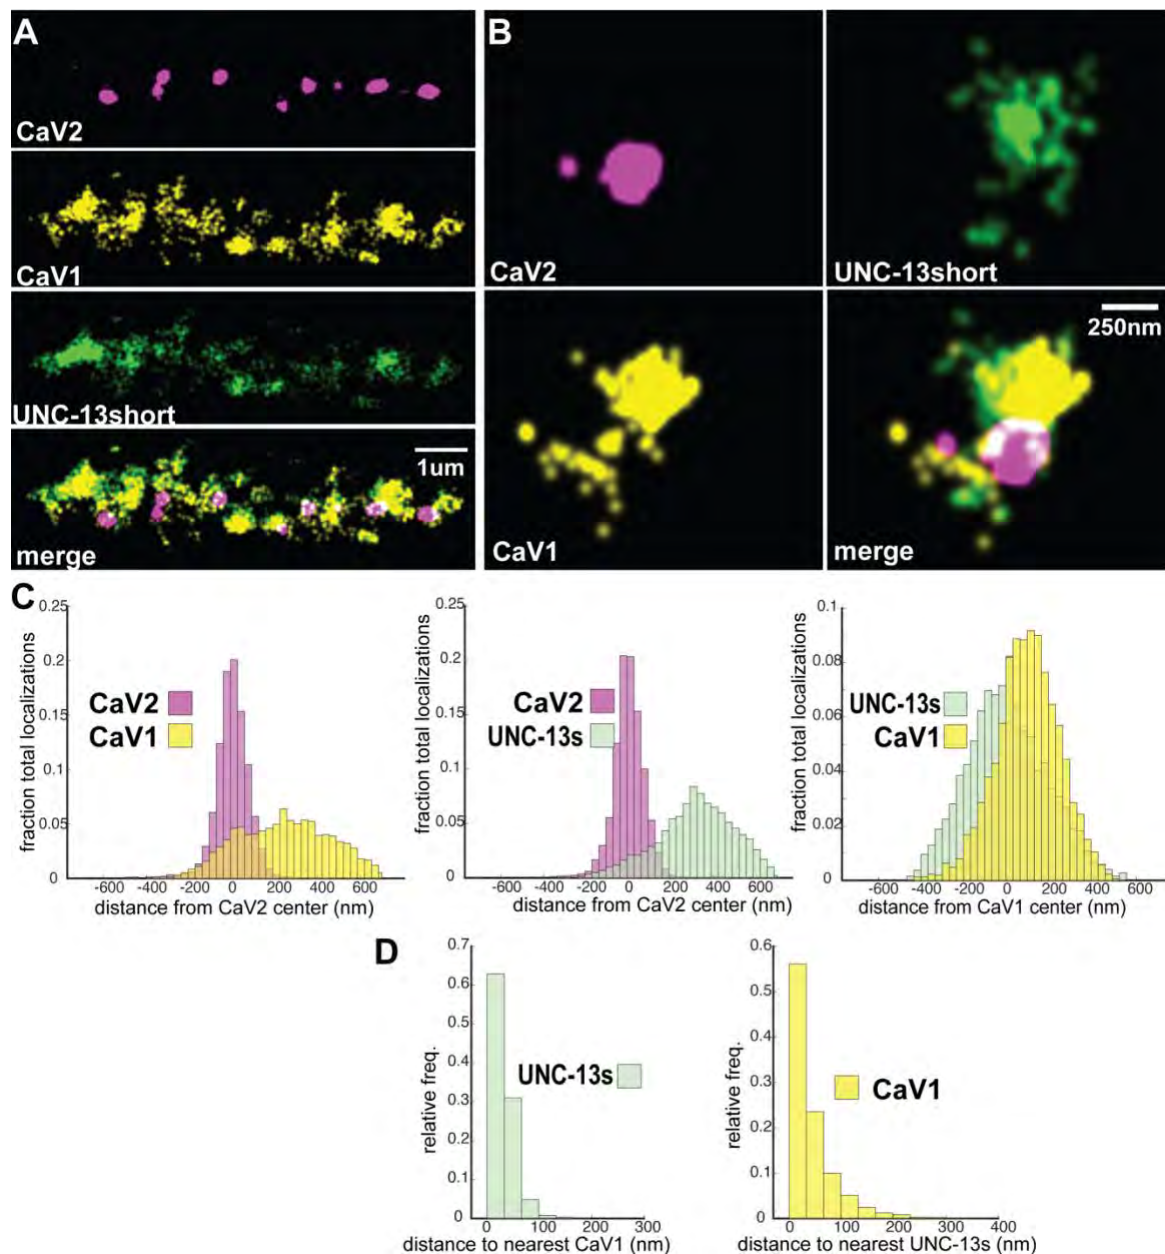

52  
53  
54  
55  
56  
57  
58  
59  
60  
61  
62  
63  
64  
65  
66  
67  
68  
69

**Figure 7. UNC-13s localizes with CaV1 but not CaV2 calcium channels.**

Localization microscopy identifies CaV1 associated with *unc-13(ox814[SKY-S])* which labels a n-terminal site common to a short isoform.

(a) UNC-13short colocalizes with CaV1 throughout the dorsal cord. Dorsal cord images labelled with CaV2/*unc-2(ox672[HALO])*, CaV1/*egl-19(ox728[SNAP])* and UNC-13s/*unc-13(ox814[SKY-S])*. Animals stained with HTL-JF646 and STL-JF549.

(b) UNC-13short colocalizes with CaV1 within a single synapse. Single synapse region of interests: images labelled with CaV2/*unc-2(ox672[HALO])*, CaV1/*egl-19(ox728[SNAP])* and UNC-13s/*unc-13(ox814[SKY-S])*. Animals stained with HTL-JF646 and STL-JF549.

(c) Cumulative frequency distribution plot of distances from CaV1/*egl-19(ox728[SNAP])* localization to CaV2/*unc-2(ox672[HALO])* cluster center. Cumulative frequency distribution plot of distance from UNC-13s/*unc-13(ox814[SKY-S])* localizations to CaV2/*unc-2(ox672[HALO])* cluster center was measured from single synapses. Distance from UNC-13s/*unc-13(ox814[SKY-S])* localizations to CaV1/*egl-19(ox728[SNAP])* cluster center was measured from single synapses.

(d) Nearest-neighbor distances between CaV1/*egl-19(ox728[SNAP])* and UNC-13s/*unc-13(ox814[SKY-S])* localizations. Nearest neighbor analysis between UNC-13s/*unc-13(ox814[SKY-S])* and CaV1/*egl-19(ox728[SNAP])*.

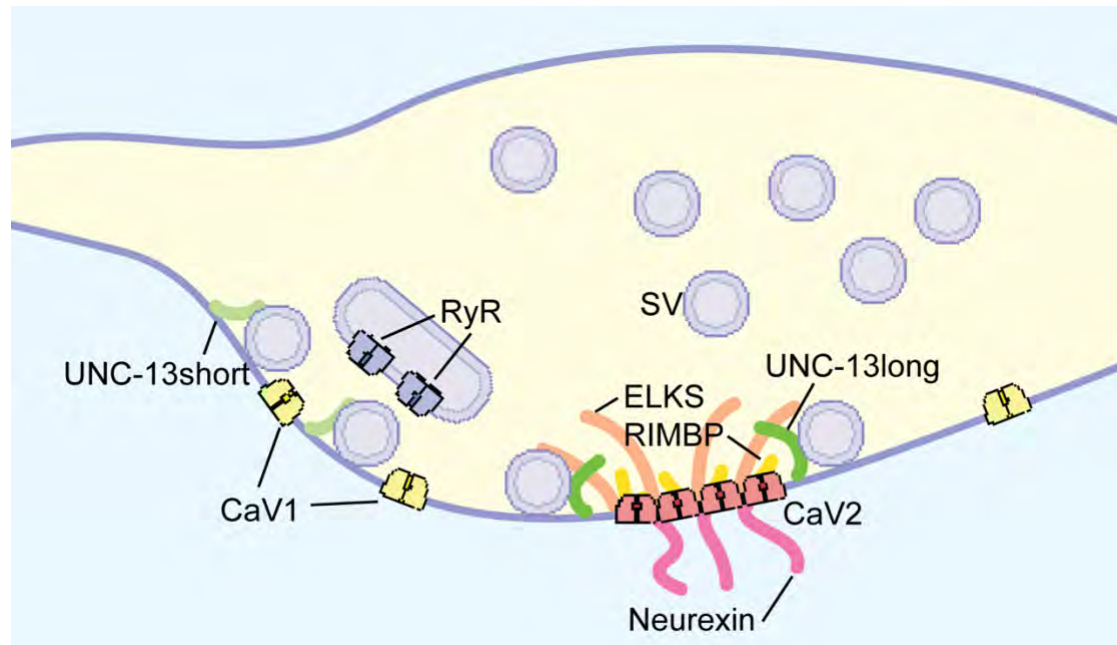

70  
71

72 **Figure 8. Two sites of fusion for synaptic vesicles**

73 Voltage gated calcium channels at the neuromuscular presynapse of *C. elegans* localize to two  
74 distinct areas. CaV2 localizes to the dense projection along with ELKS, RIMBP, Neurexin, CaV2 and  
75 UNC-13L. Here, CaV2 is required to fuse a near pool of synaptic vesicles which dock within 100nm  
76 of the dense projection. The second, lateral site is centered at 300nm away from the dense  
77 projection but can span hundreds of nanometers. CaV1 localizes to the lateral site, along with  
78 ryanodine receptor. Here, CaV1 and RyR are required to fuse a lateral pool of vesicles which dock  
79 >100nm from the dense projection. These near and far pools utilize specific release machinery. Most  
80 UNC-13all localizes to the dense projection. However, some UNC-13 localizes with CaV1 at the  
81 lateral site. Isoform specific tagging shows UNC-13S localized with lateral site.

82

83

84 **Table S1: Viability of calcium channel mutants.**

85

| viability | +  | +       | -       | +                  | +      | -       | -                  | +                   | +      |
|-----------|----|---------|---------|--------------------|--------|---------|--------------------|---------------------|--------|
| genotype  | +  | CaV2(-) | +       | +                  | +      | CaV2(-) | CaV2(-)            | CaV2( $\Delta$ nmj) | +      |
| CaV2      | +  | +       | CaV1(-) | CaV1( $\Delta$ ns) | +      | +       | CaV1( $\Delta$ ns) | CaV1( $\Delta$ ns)  | +      |
| CaV1      | +  | +       | +       | +                  | RyR(-) | +       | +                  | +                   | +      |
| RyR       | +  | +       | +       | +                  | +      | RyR(-)  | +                  | +                   | RyR(-) |
| strain    | N2 | AQ130   | n/a     | EG9034             | CB540  | n/a     | n/a                | EG9406              | EG8827 |

86

87

88

| allele | gene             | sgRNA                          | Repair Template | tag   | chr | terminus |
|--------|------------------|--------------------------------|-----------------|-------|-----|----------|
| ox672  | <i>unc-2</i>     | pSAM429 (ACAGACCGCCAACCAACCGG) | pSAM593         | HALO  | X   | internal |
| ox704  | <i>rimb-1</i>    | TGGGTAAATCGATAAATCG            | pSAM514         | SKY-S | III | c        |
| ox719  | <i>nrx-1</i>     | TTTTCTTTGCCACCCCATTC           | pSAM534         | SKY-S | V   | c        |
| ox721  | <i>unc-68</i>    | pSAM488 (gattagtagtccaagaaA)   | pSAM593h        | HALO  | V   | n        |
| ox727  | <i>ctn-1d</i>    | CATCCAATGTAATCGGC              | pSAM598         | SKY-S | III | c        |
| ox728  | <i>egl-19</i>    | CTTCTCATCCATTGCTC              | pSAM604         | SNAP  | IV  | internal |
| ox729  | <i>syd-1</i>     | GCACTGCGATTCCGAGACAT           | pSAM545         | SKY-S | II  | c        |
| ox730  | <i>syd-2</i>     | TTGCTGTAGCTCATatttct           | pSAM549         | SKY-S | X   | n        |
| ox731  | <i>syg-1</i>     | GGACCACTTCCGGCGACGAG           | pSAM544         | SKY-S | X   | c        |
| ox747  | <i>elks-1</i>    | gagcagtacaatATGGCACC           | pSAM550         | SKY-S | IV  | n        |
| ox748  | <i>unc-13all</i> | gctttgaatccaacaaaaaa           | pSAM613         | SKY-S | I   | c        |
| ox803  | <i>magi-1</i>    | aagATGACCGACAAAACAGC           | pSAM552         | SKY-S | IV  | n        |
| ox814  | <i>unc-13b</i>   | GGAAGTCAAGACTTGGCAC            | pSAM684         | SKY-S | I   | n        |
| ox802  | <i>unc-44</i>    | GCTGTTGGTCGTGCTCCCGA           | pSAM546         | SKY-S | IV  | c        |
| ox708  | <i>unc-44</i>    | GCTGTTGGTCGTGCTCCCGA           | pSAM557         | SNAP  | IV  | c        |

89 **Table S2: Super-resolution Alleles Generated for this study.**
